# Supplementary material for: The Chinese mitten crab genome provides insights into adaptive plasticity and developmental regulation
Source: PubMed Central journal article supplement (PMC8062507; doi:10.1038/s41467-021-22604-3), 2021-04-22
Supplement: 41467_2021_22604_MOESM1_ESM.pdf [file 41467_2021_22604_MOESM1_ESM.pdf]

# Supplementary Information

## The Chinese mitten crab genome provides insights into adaptive plasticity and developmental regulation

### Supplementary Figures

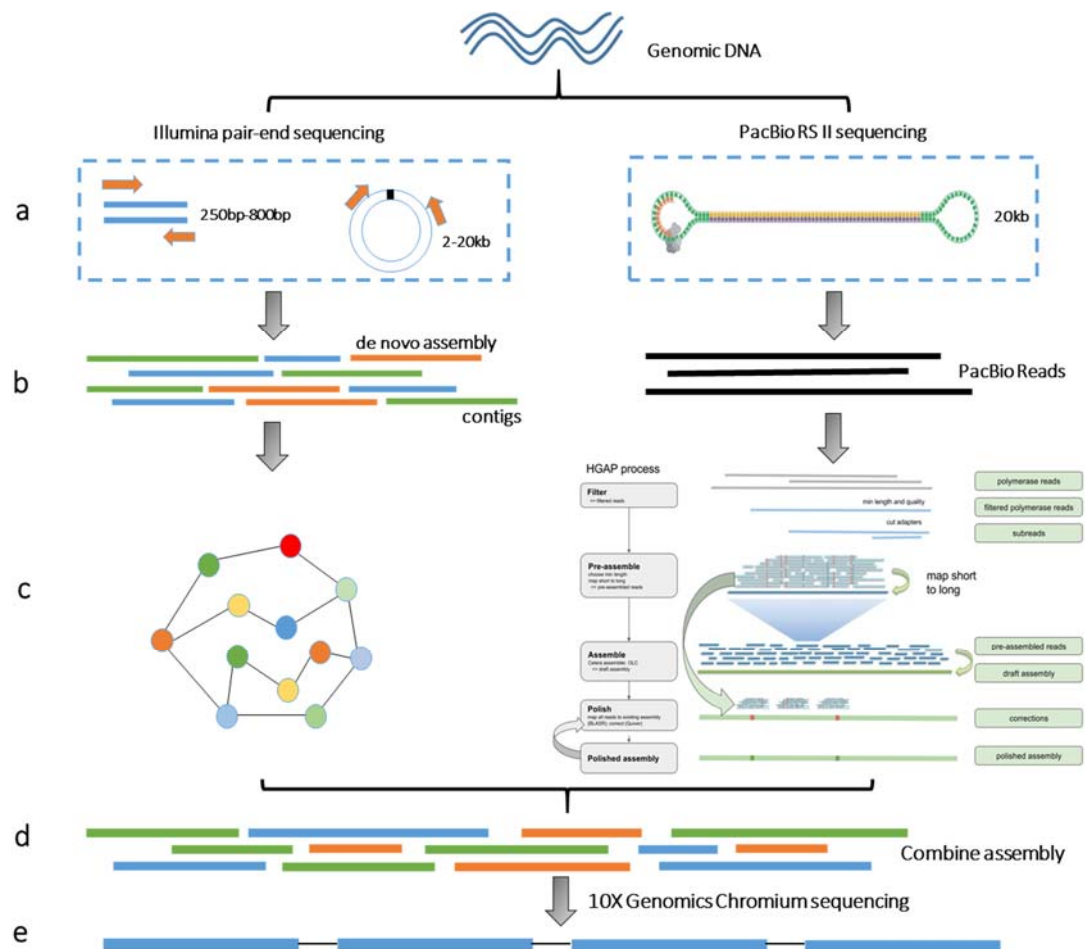

**Supplementary Figure 1. Strategy for *E. sinensis* genome assembly.** (a) Illumina short and long-insert libraries were constructed, and  $\sim 258\times$  coverage of sequencing reads were generated. PacBio RS II sequencing was performed on SMRT cells to generate  $\sim 55$  Gb PacBio long reads with  $\sim 35\times$  coverage. (b) The Illumina data were

assembled into contigs using Discover denovo with optimizing parameters. (c) Graph module account  $k$ -mer frequency from Illumina reads, with the unique  $k$ -mer extracted for alignment and the removal of duplication in the latter modules. The PacBio data were assembled by Falcon. (d) Combination of the Illumina and PacBio contigs by HABOT2. (e) Scaffolds were built using  $\sim 106\times$  coverage of 10x Genomics Chromium data.

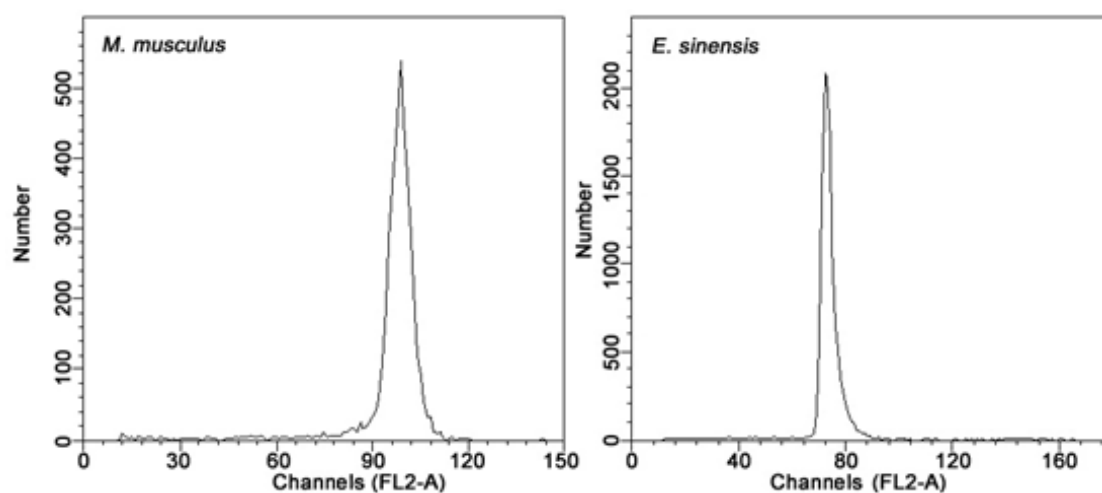

**Supplementary Figure 2. Genome size estimation of *E. sinensis* by flow cytometric analysis.** The results provided an estimation of 1.81 pg/1C (peak at 73.11), which was equivalent to 1.77 Gb per haploid genome of *E. sinensis* based on the formula: 1 pg = 0.978 Gb. The blood of *Mus musculus* (2.45 pg/1C, peak at 98.76) was used as an internal standard.

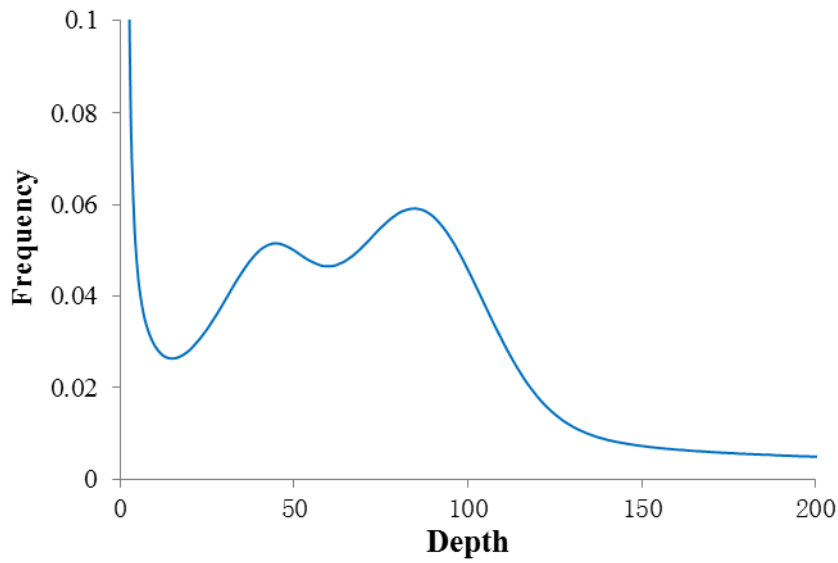

**Supplementary Figure 3. Distribution of 21-mer frequency in the *E. sinensis* genome.** The paired-end reads were derived from the sequencing of DNA libraries, with insert sizes of 250 bp and 500 bp. Two peaks rather than one were observed, indicating high genomic heterozygosity. The genome size of *E. sinensis* was estimated as:  $(\text{total number of 21-mers})/(\text{homozygous peak depth}) = 1.45 \text{ Gb}$ .

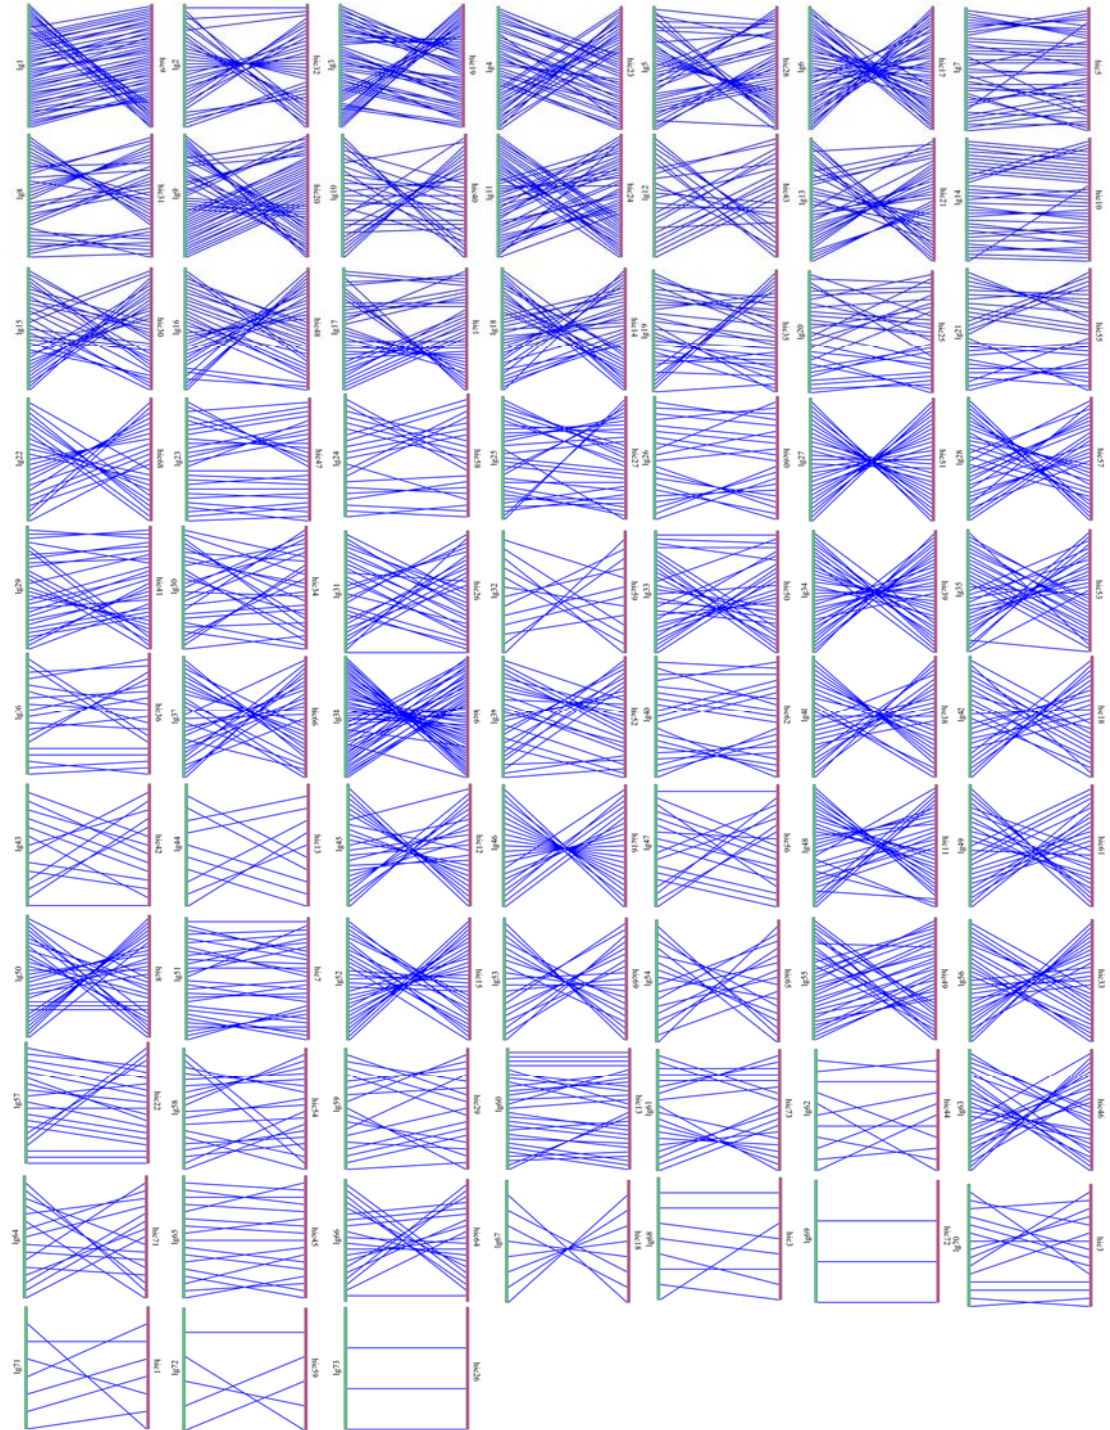

**Supplementary Figure 4. 67 chromosomes assembled using linkage map were consistent with 73 chromosomes assembled using Hi-C data.**

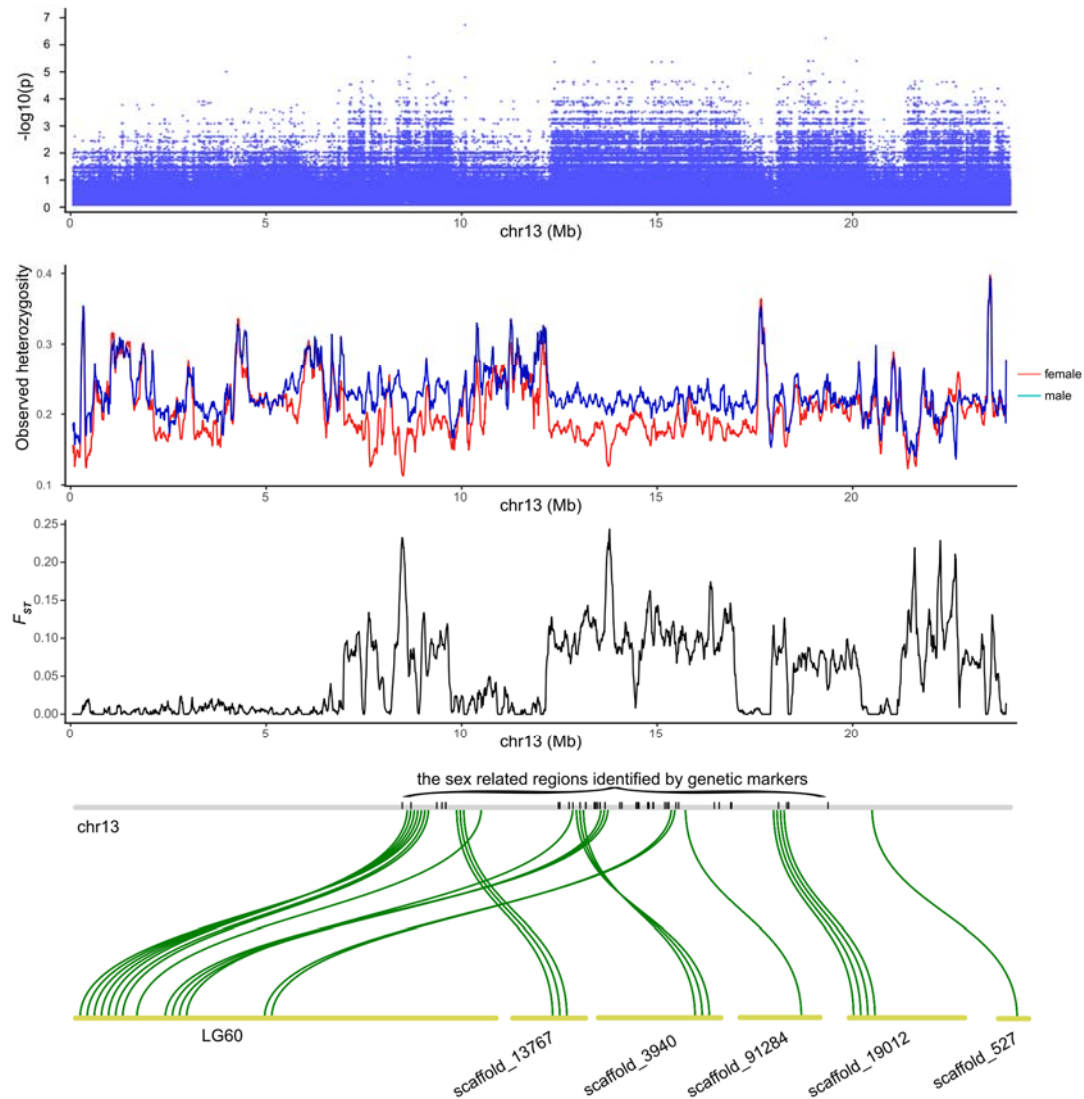

**Supplementary Figure 5. The sex-related genes in chr13, and three parameters ( $F_{ST}$ ,  $H_{obs}$ , and  $-\log_{10}(p\text{-value})$ ) along chromosome chr13.** a) In the first graph below, the green lines represent the 26 sex-related genes in chr13. The sex-related makers previously identified by linkage map are drawn in black whiskers. b) The second graph below shows the  $F_{ST}$  along chromosome chr13. c) The third graph below shows the observed heterozygosity ( $H_{obs}$ ) of female and male populations along chromosome chr13. d) The negative logarithm of GWAS p-value along chromosome chr13.

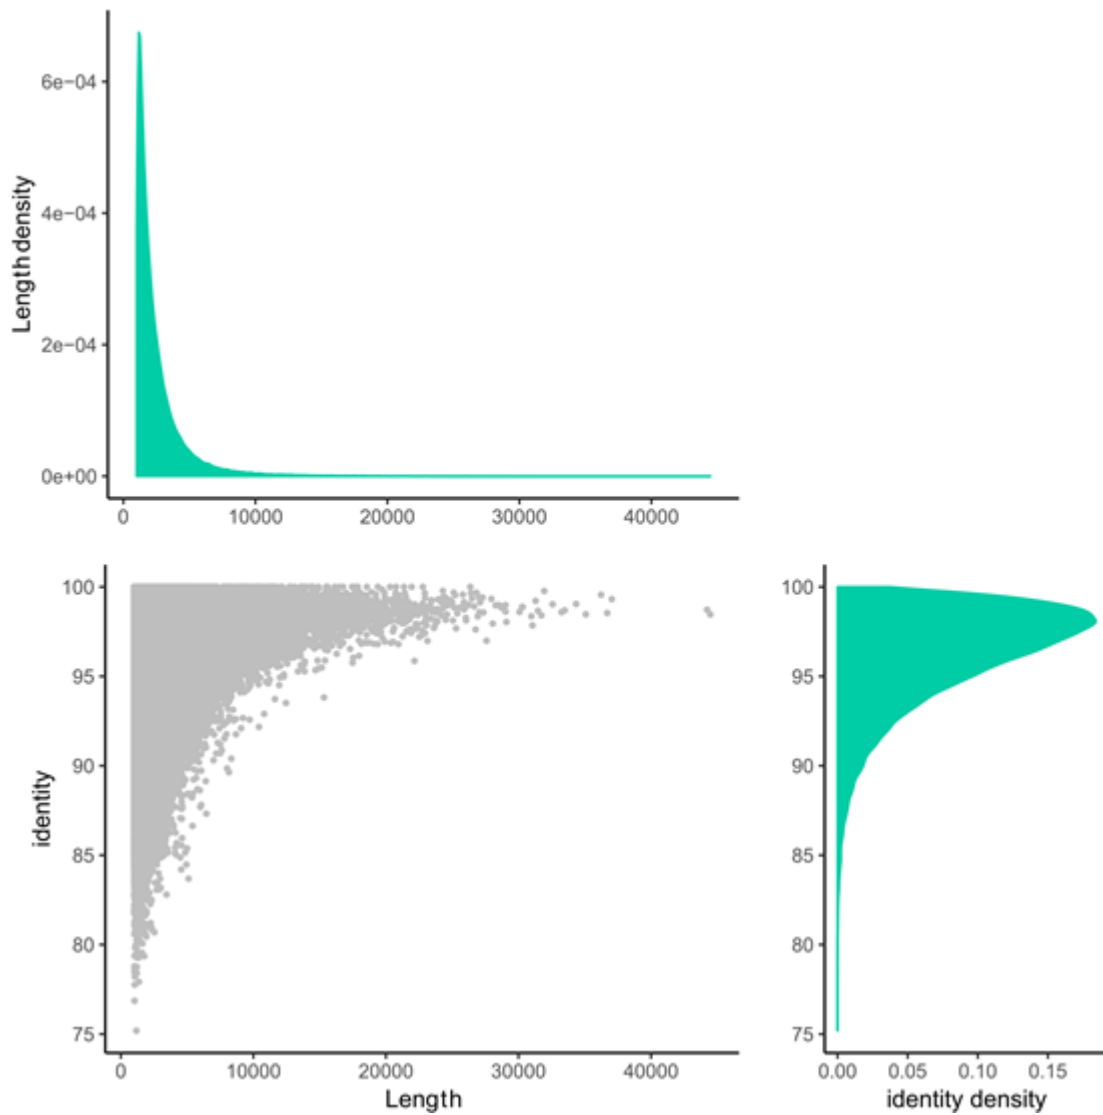

**Supplementary Figure 6. Statistics of the alignment using NUCmer between the male genome in our study and the female genome in a previous study.** The middle scatter plot represents the length and identity of each aligned segment (>1kb). The graph on the right shows the frequency distribution of the alignment identity, and the distribution of the alignment length is shown at the top.

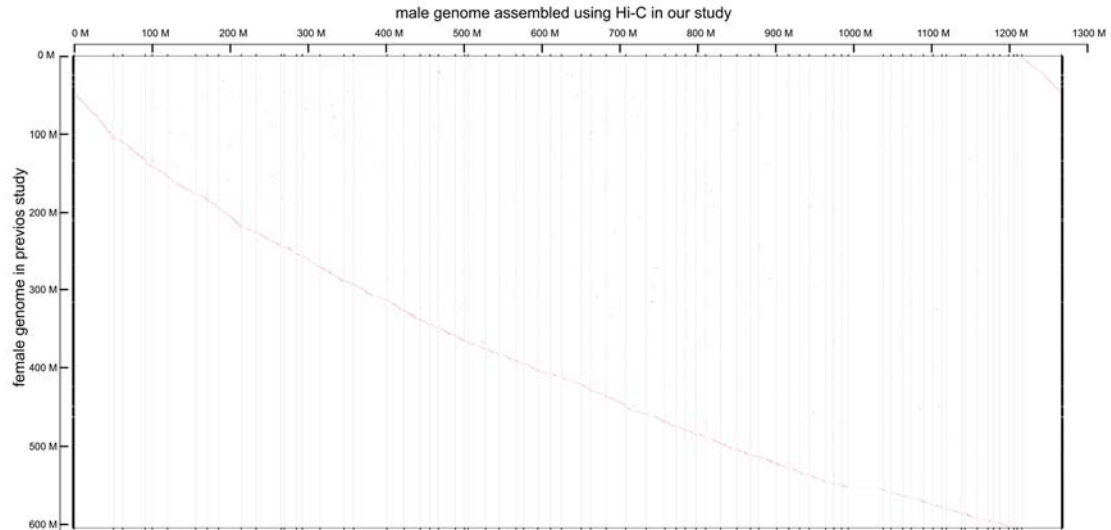

**Supplementary Figure 7. The synteny of the male genome in our study and the female genome in a previous study.** The alignment was re-ordered to the diagonal for ease of viewing. Only the alignment fragments with lengths more than 5kb are shown. The forward matches are displayed in red and the reverse matches in blue. x-axis: our male genome, y-axis: female genome in a previous study.



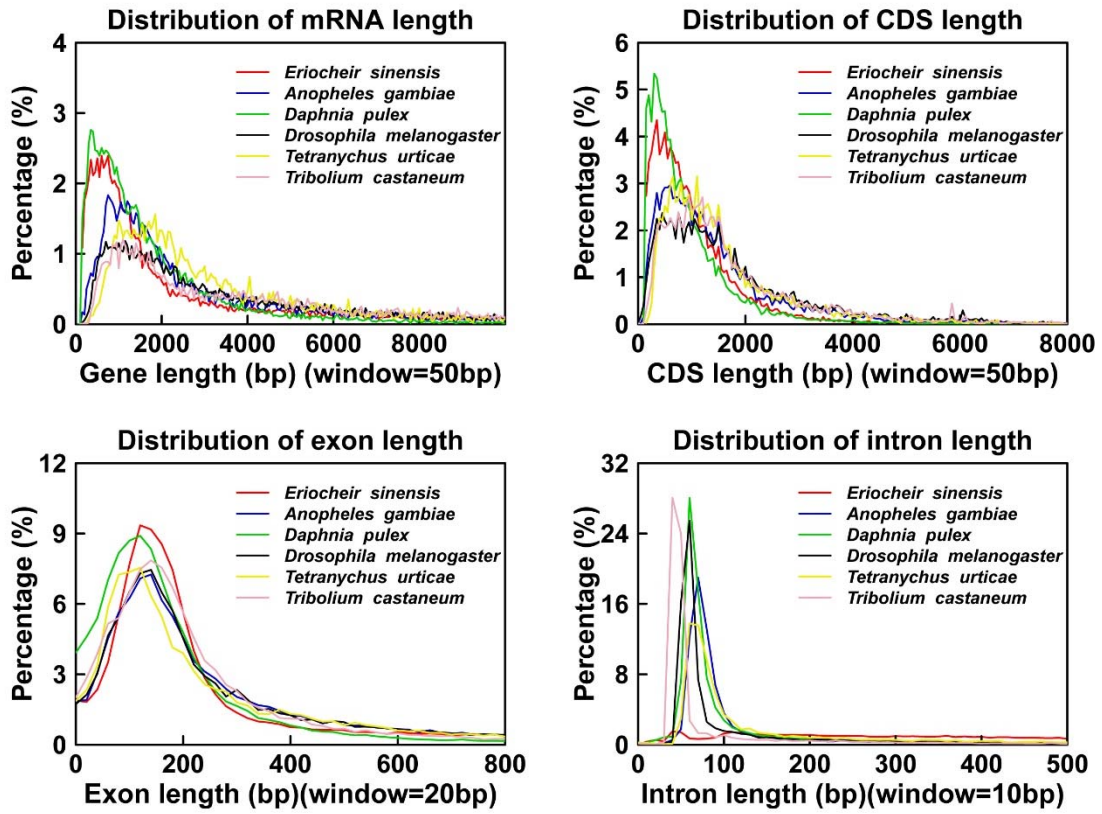

Supplementary Figure 8. Characterization of different genic regions in *E. sinensis* and five other arthropods.



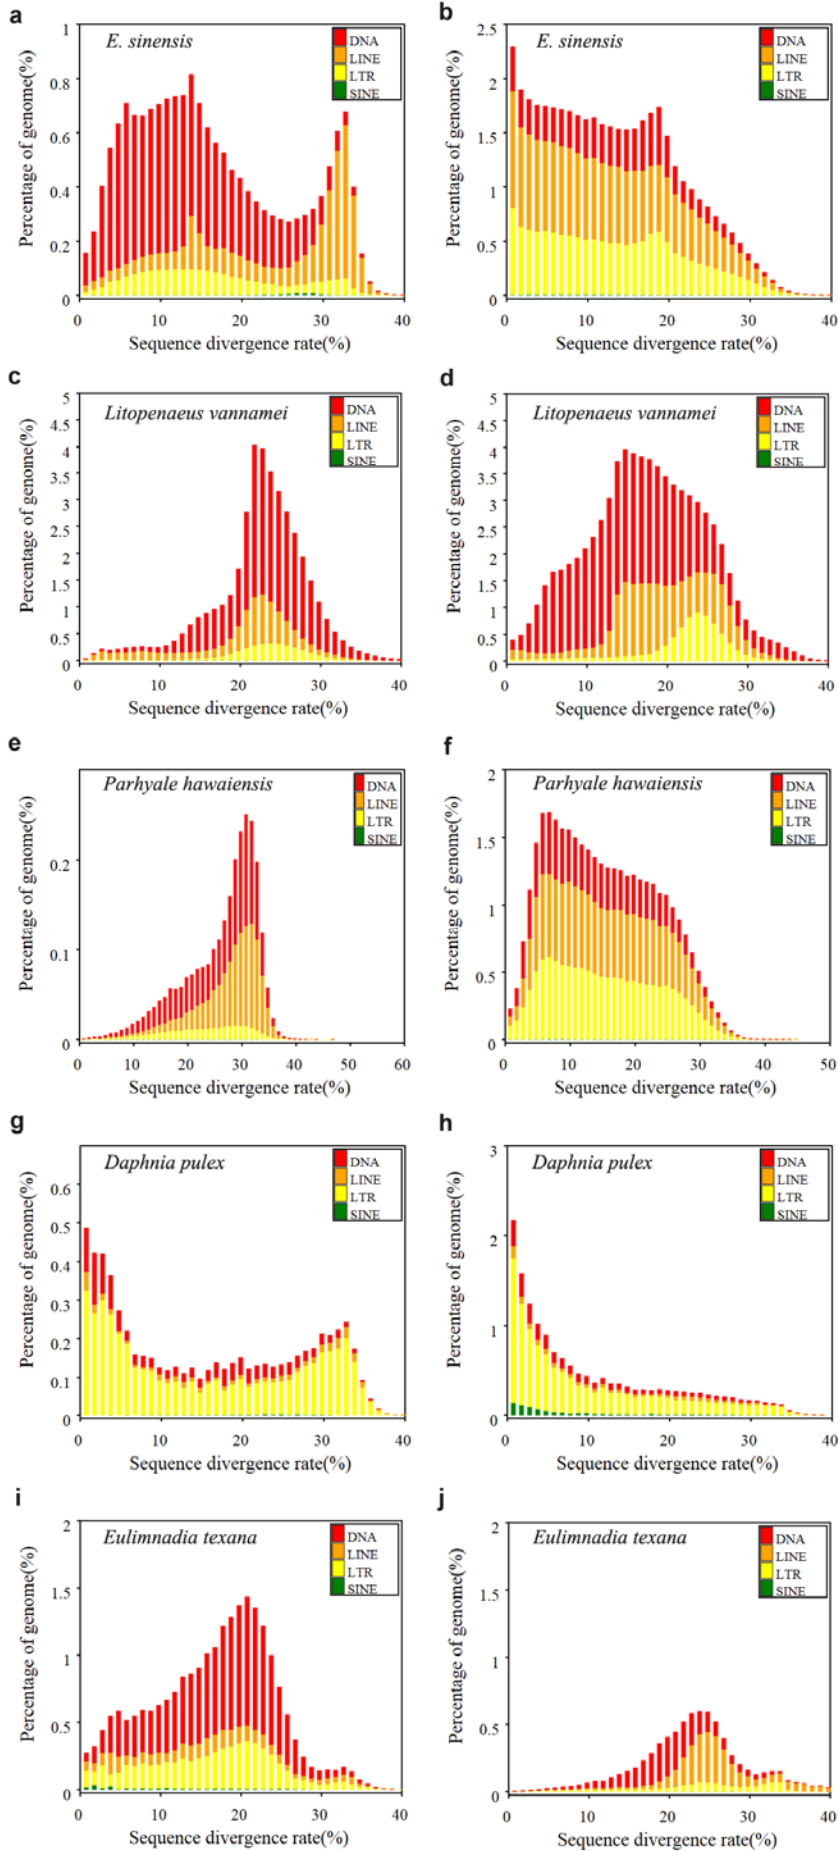

**Supplementary Figure 9. Divergence rates of transposable elements (TEs) identified by homology (a, c, e, g and i) or *de novo* prediction (b, d, f, h and j). *E. sinensis* (a, b) shows a higher proportion of active TEs (divergence rate < 10%) than those of the crustaceans *Litopenaeus vannamei* (c, d), *Parhyale hawaiiensis* (e, f), *Daphnia pulex* (g, h) and *Eulimnadia texana* (i and j).**

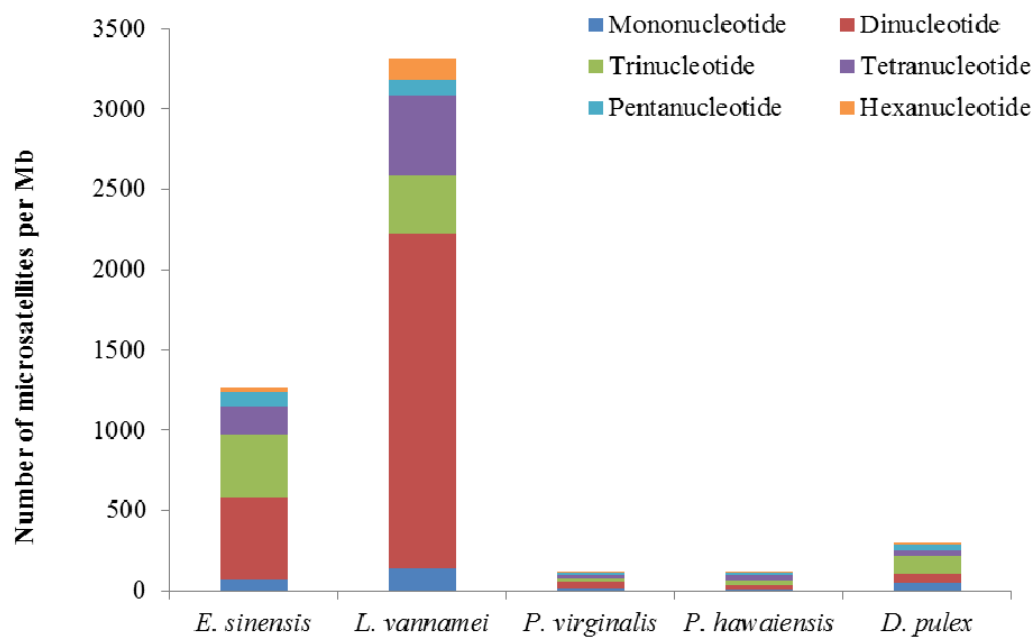

**Supplementary Figure 10. Comparison of full-genome microsatellite density between *E. sinensis* and four other crustaceans.**

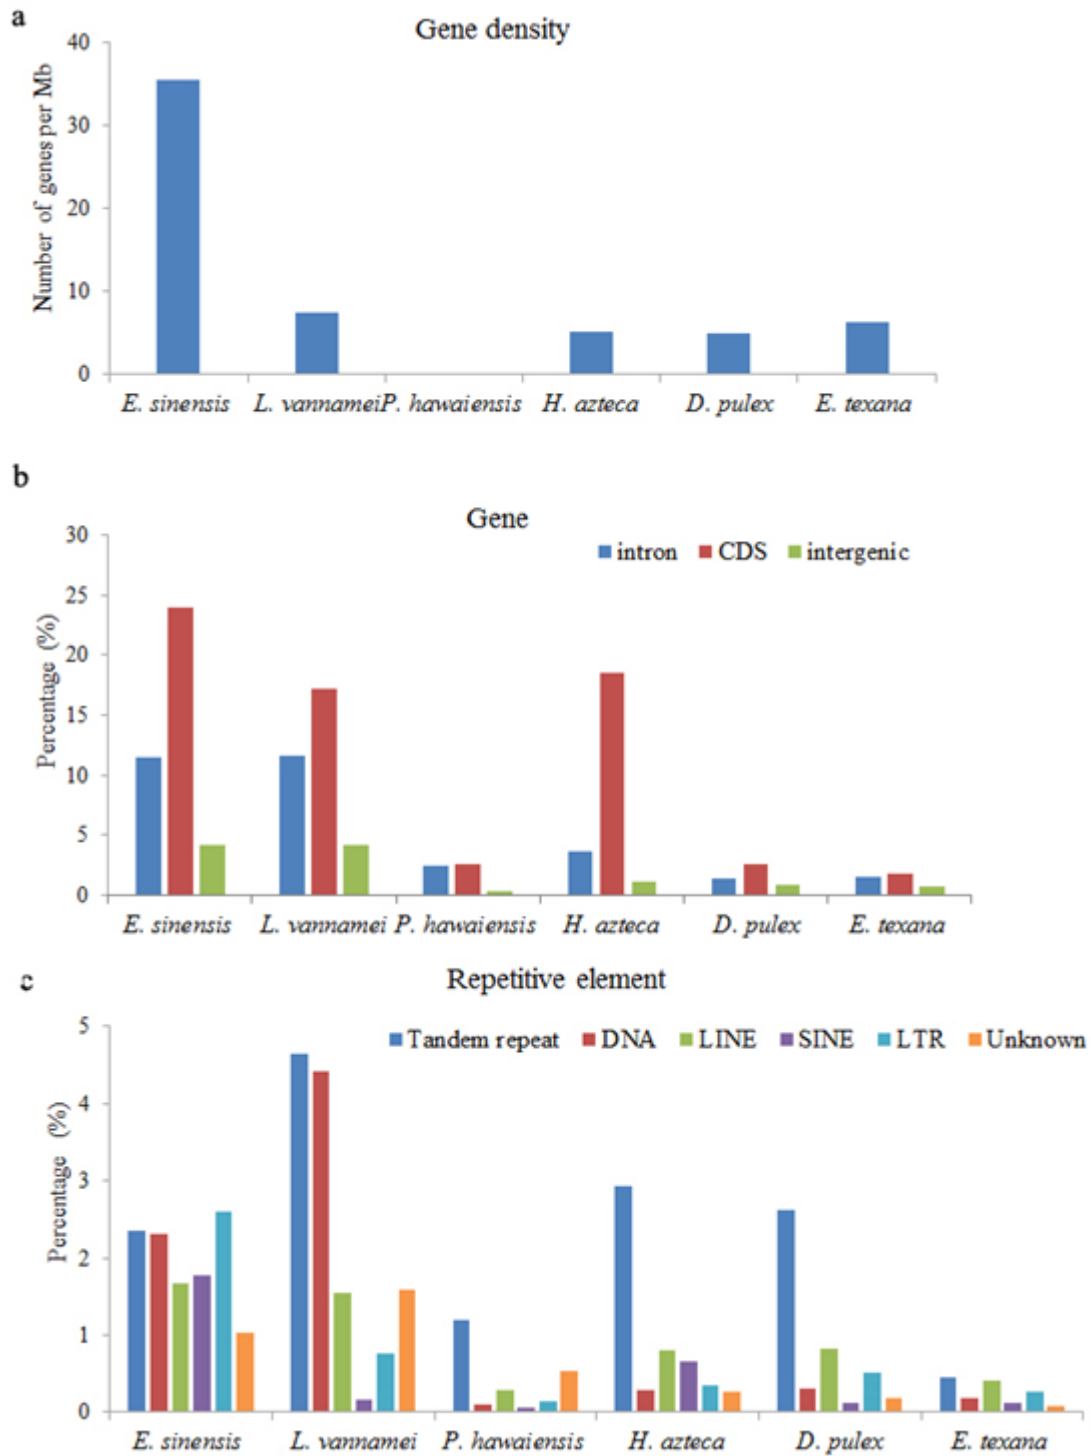

**Supplementary Figure 11. Gene density (a) and percentage of GC-rich regions (> 60%) in respective classification of genes (b) and repetitive elements (c) in the genomes of six representative crustacean species.**

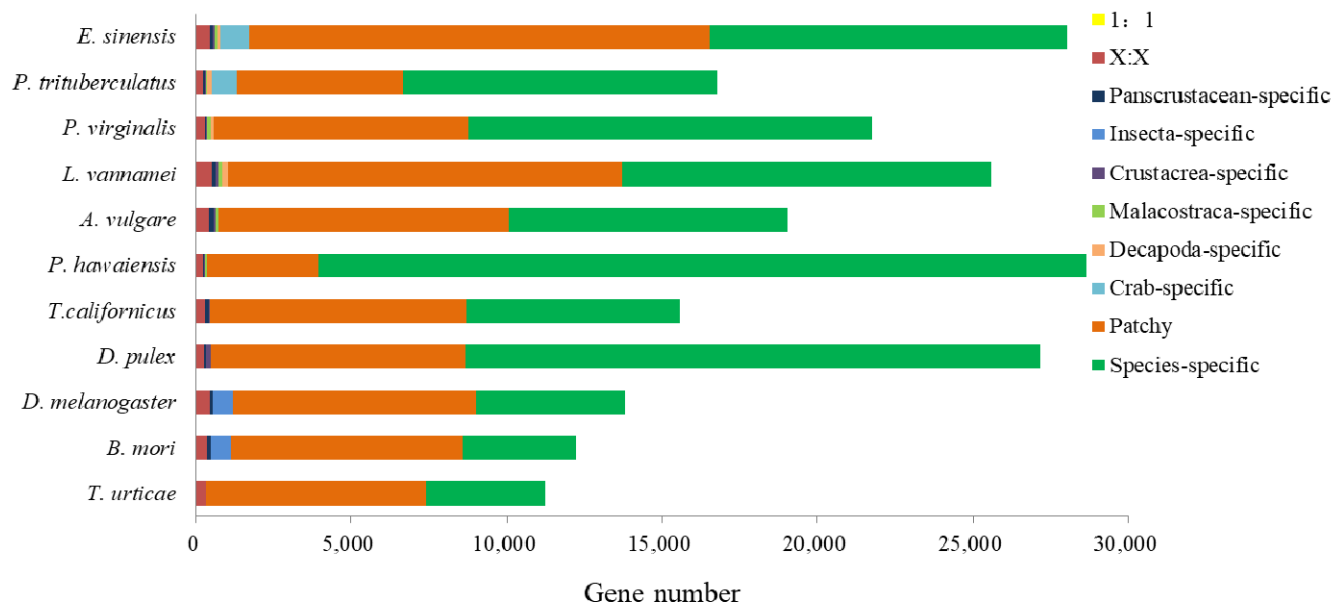

**Supplementary Figure 12. Comparison of the gene repertoire of 11 arthropod genomes.** Bars are subdivided to represent different types of orthology relationships. “1:1” indicates single-copy genes; “X:X” indicates orthologous genes present in multiple copies in all the 11 species, where X denotes one or more orthologs per species; and “Patchy” indicates the existence of other orthologs that are present in at least one genome.

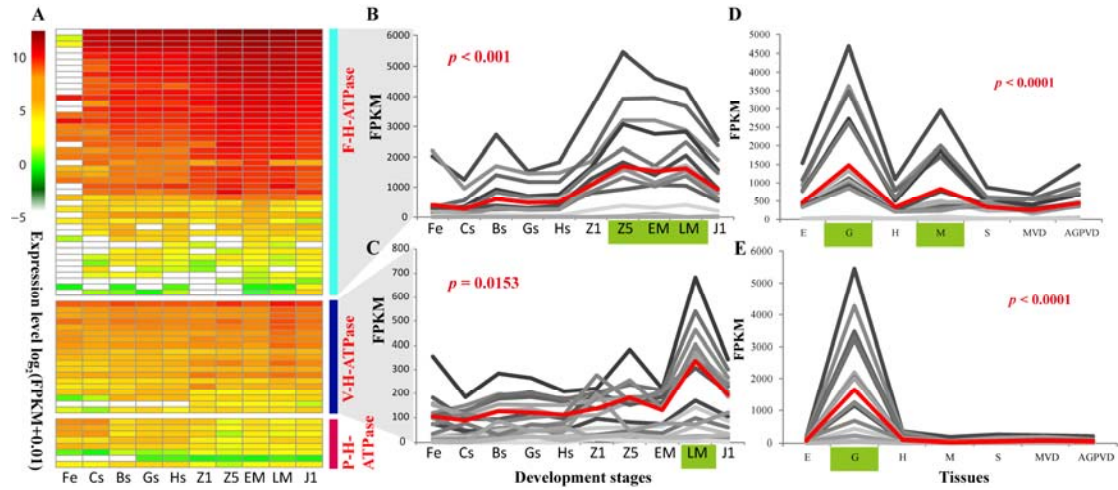

**Supplementary Figure 13. The expression patterns of three types of H<sup>+</sup> pump.** (A) Heatmap displayed the expression patterns of three types of H<sup>+</sup> pump during the following life history stages: fertilized egg stage (Fe), cell stage (Cs), blastula stage (Bs), gastrula stage (Gs), heartbeat stage (Hs), first zoeal stage (Z1), fifth zoeal stage (Z5), megalopa before desalination (EM), megalopa after desalination (LM), and first juvenile instar (J1). The megalopae underwent a process of desalination during development. The expression patterns of F-ATPases and V-ATPases during different development stages and among different tissues are displayed in four line chart plots (B-E). The gray lines indicate the expression pattern of each gene, and the red lines indicate the mean expression level. Tissues include eyestalk (E), gill (G), hepatopancreas (H), muscle (M), sexual gland (S), ED ejaculatory duct (MVD) and androgenic gland with ejaculatory duct (AGPVD). The *p* value indicates the consistence of expression pattern, which was calculated using two-sided F test. A lower *p* value indicates a higher similarity of the expression pattern.

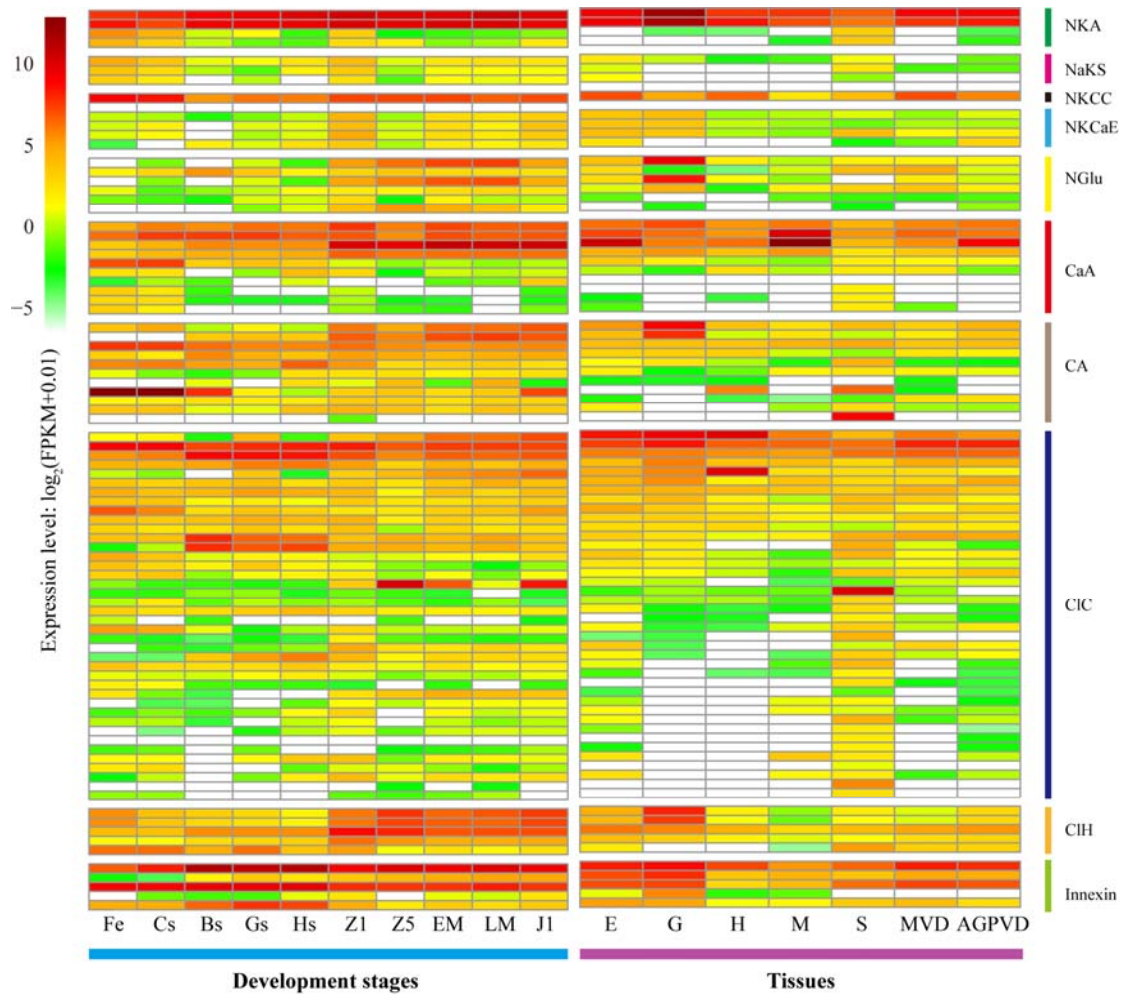

**Supplementary Figure 14. Heatmap of the expression patterns of osmoregulation related genes during different life history stages and among different tissues.** The osmoregulation related genes include  $\text{Na}^+/\text{K}^+$  ATPase (NKA),  $\text{Na}^+/\text{K}^+$  symporter (NaKs),  $\text{Na}^+/\text{K}^+/\text{2Cl}^-$  cotransporter (NKCC),  $\text{Na}^+/\text{K}^+/\text{Ca}^{2+}$  exchanger (NKCaE), sodium/glucose cotransporter (NGlu),  $\text{Ca}^{2+}$  transporting ATPase (CaA), carbonic anhydrase (CA), chloride channel protein (CIC),  $\text{Na}^+$ -independent  $\text{Cl}/\text{HCO}_3^-$  exchanger (ClH), and innexin. The various life history stages were: fertilized egg stage (Fe), cell stage (Cs), blastula stage (Bs), gastrula stage (Gs), heartbeat stage (Hs), first zoeal stage (Z1), fifth zoeal stage (Z5), megalopa stage before desalination (EM), megalopa stage

after desalination (LM), and first juvenile instar (J1). The megalopae underwent a process of desalination during development. Different tissues: eyestalk (E), gill (G), hepatopancreas (H), muscle (M), sexual gland (S), ED ejaculatory duct (MVD), and androgenic gland with ejaculatory duct (AGPVD).

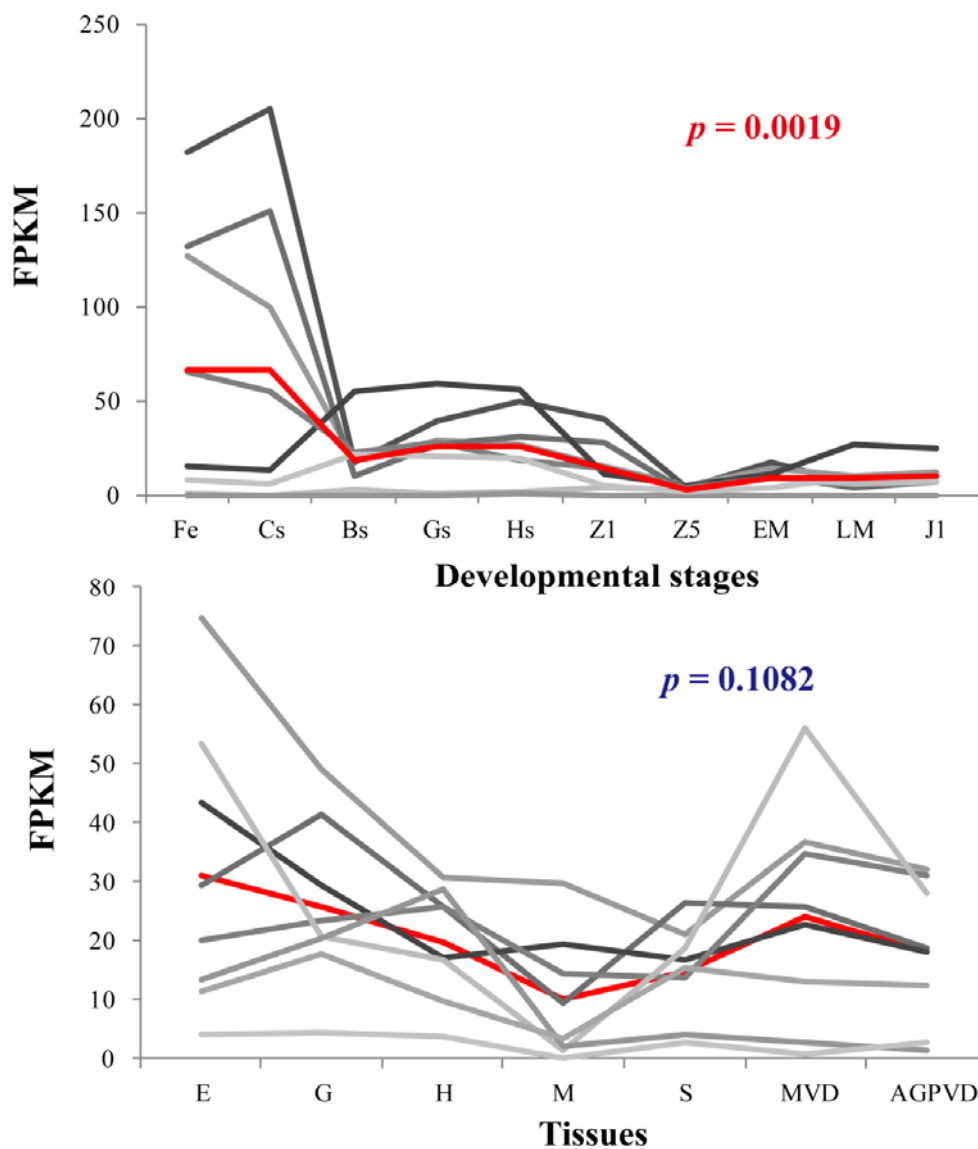

**Supplementary Figure 15. The expression patterns of P-ATPases during different life history stages and among different tissues (see legend of Supplementary**



**Figure 14).** The  $p$  value indicates the consistence of expression pattern, which was calculated using two-sided F test. A lower  $p$  value indicates a higher similarity of the expression pattern.

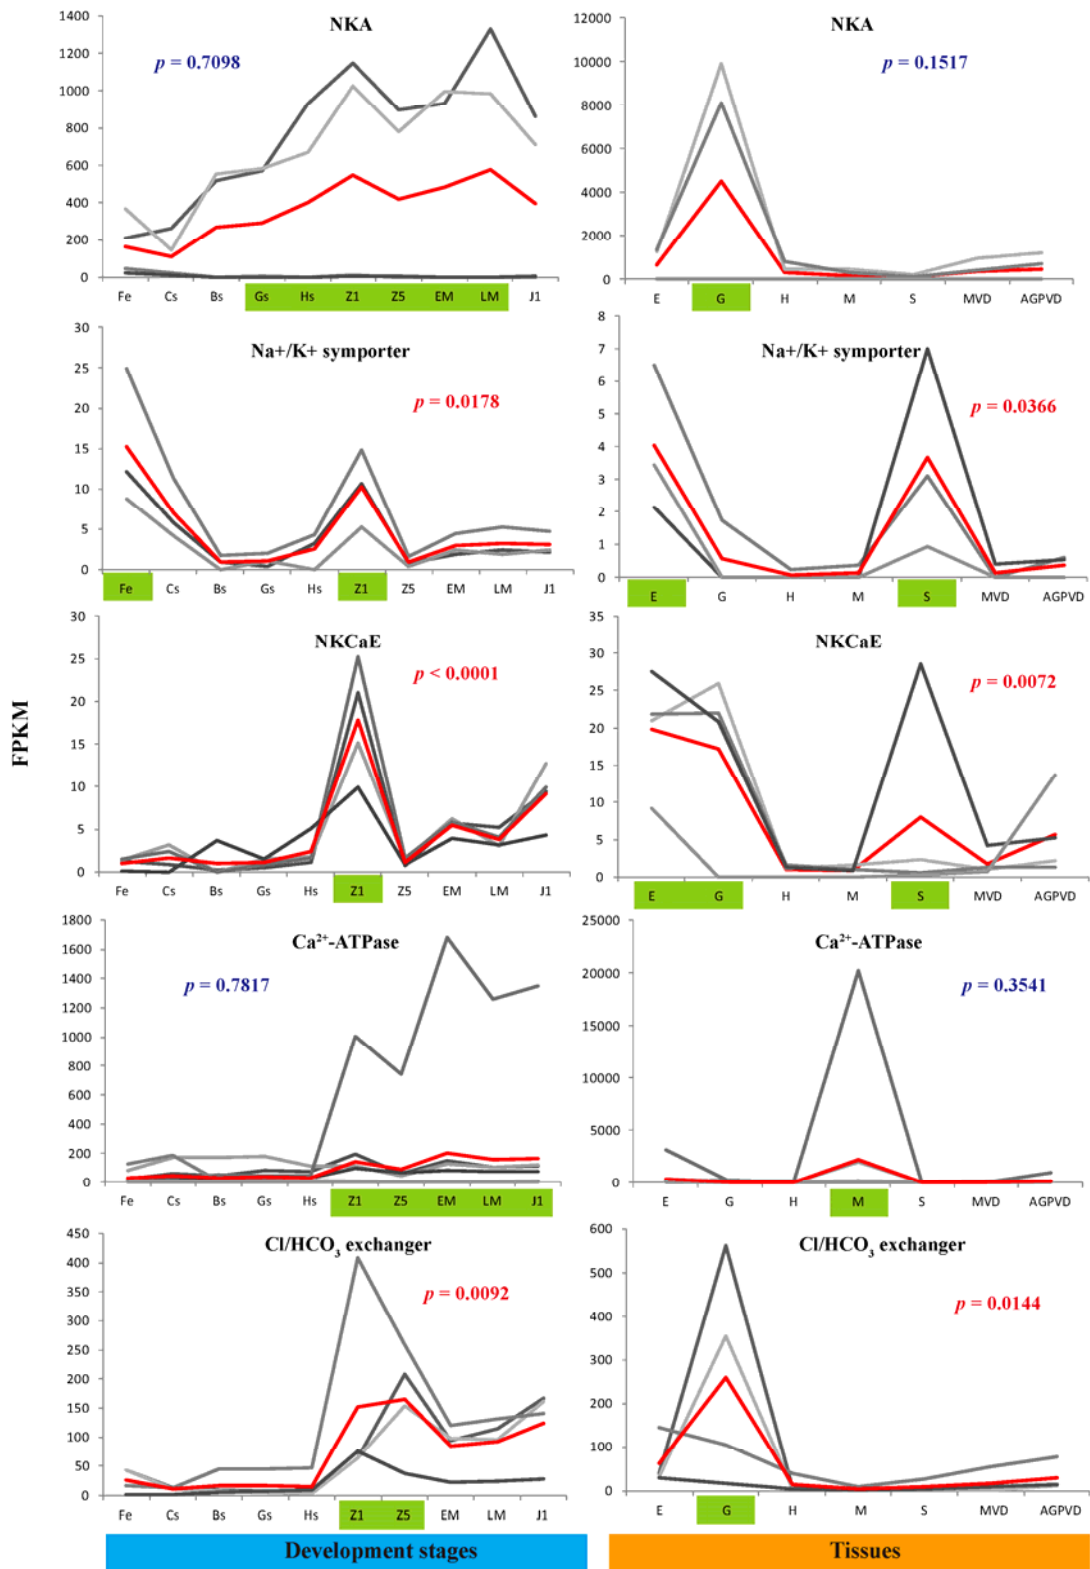

Supplementary Figure 16. The expression patterns of osmoregulation related genes during different life history stages and among different tissues (see legend of

**Supplementary Figure 14).** The  $p$  value indicates the consistence of expression pattern, which was calculated using two-sided F test. A lower  $p$  value indicates a higher similarity of the expression pattern.

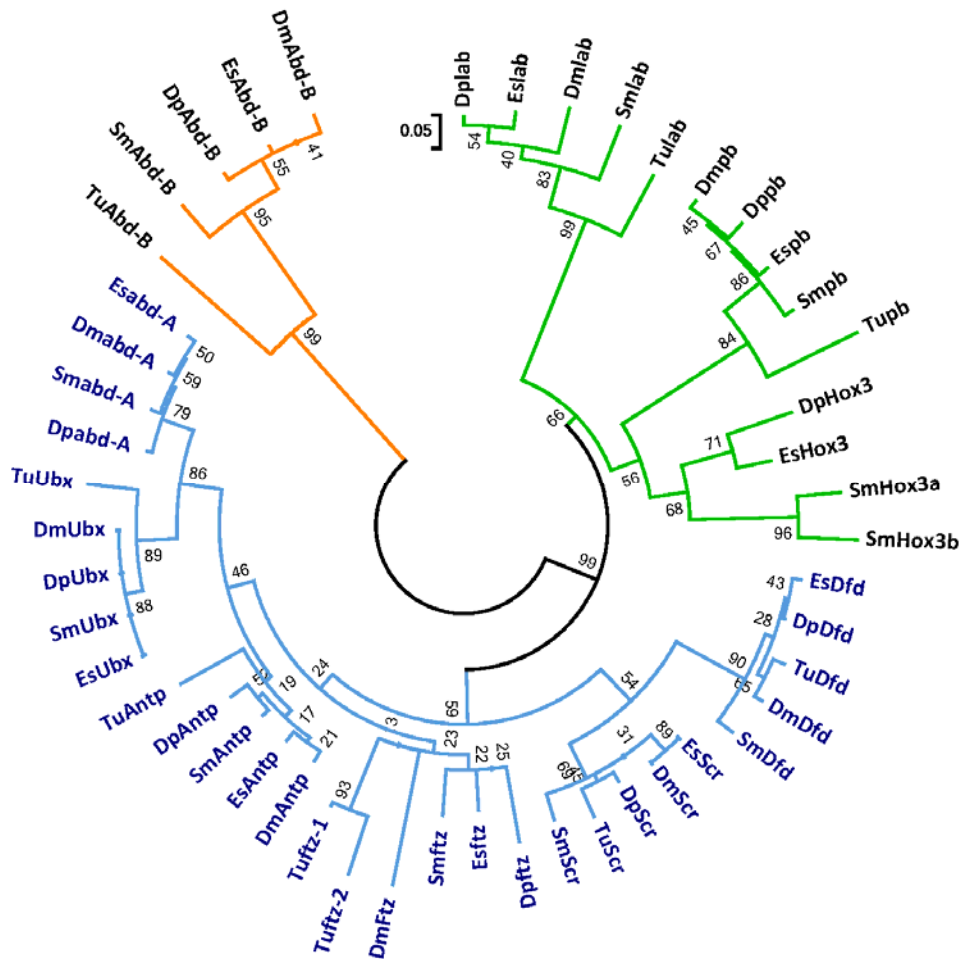

**Supplementary Figure 17. Phylogenetic relationships (in protein sequences) of Hox genes from five arthropods inferred with the maximum likelihood (ML) and neighbor-joining (NJ) methods.** Branch lengths and topologies were derived from ML analysis. Numbers in each branch indicate ML/NJ bootstrap values above 50%. Dm, *Drosophila melanogaster*; Dp, *Daphnia pulex*; Sm, *Strigamia maritima*; Es, *E. sinensis*; Tu, *Tetranychus urticae*.

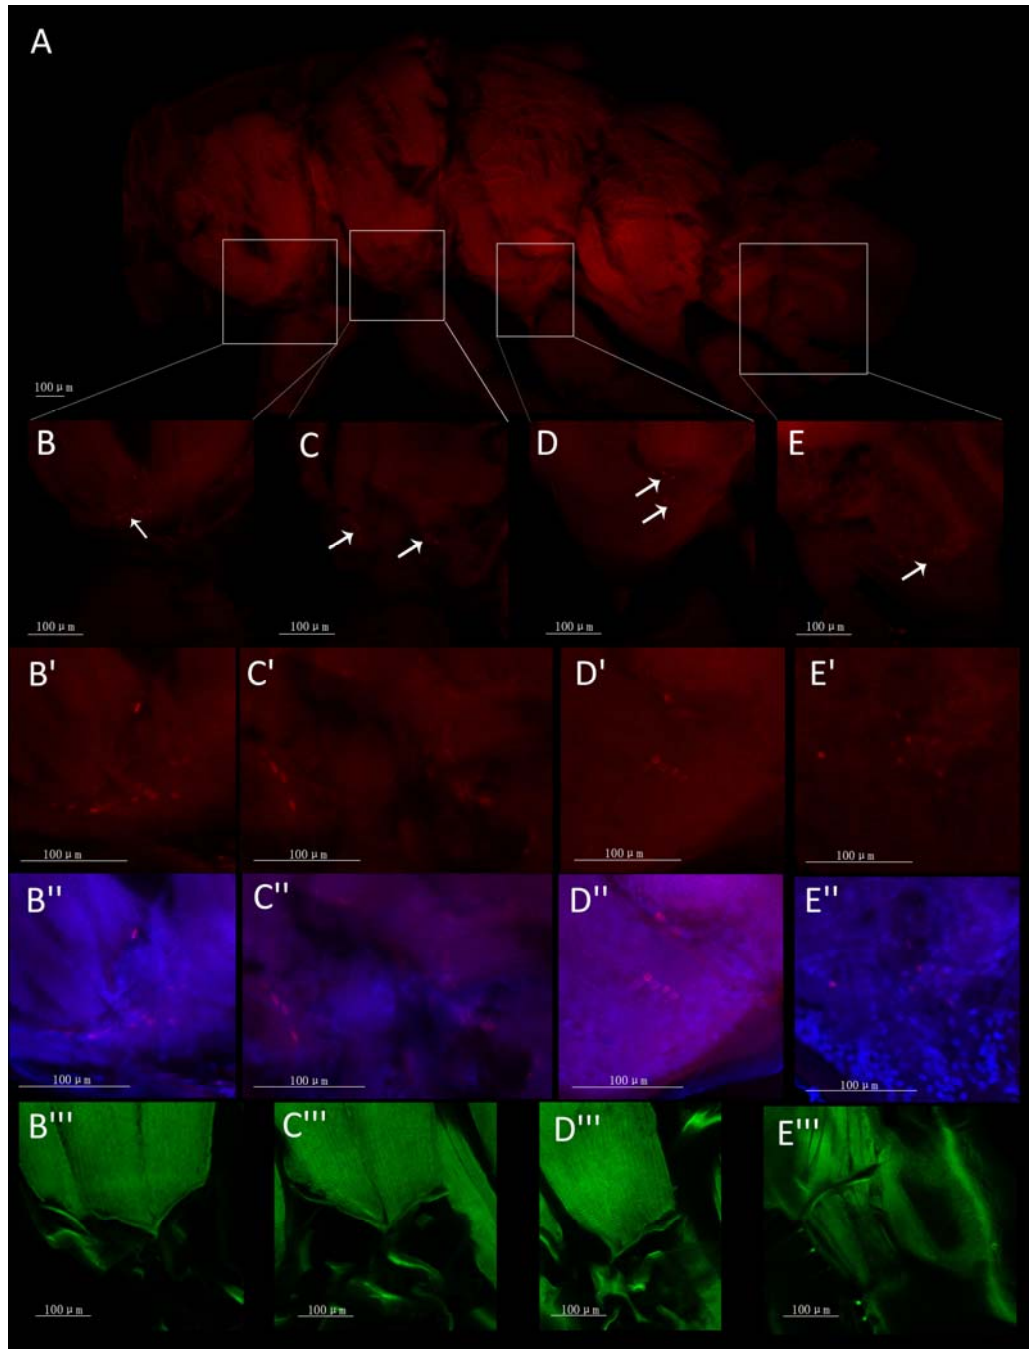

**Supplementary Figure 18. *Abd-A* localization in the abdomen of LM larva of *E. sinensis*.** The *Abd-A* mRNA primarily located in the second, third, fourth ventral segment and the caudal segment (arrows). A. Abdomen of LM larva; B. The second ventral segment of LM larva; C. The third ventral segment of LM larva; D. The fourth ventral segment of LM larva; E. The caudal segment of LM larva; B'-E'. Figure B-E

amplification; B''-E''. Merge for 5-FAM and DAPI stained picture; B'''-E''''. Control group with GFP mRNA probe; arrows indicate positive position; scale table shows 100  $\mu$ M. This experiment was repeated three times independently with similar results.

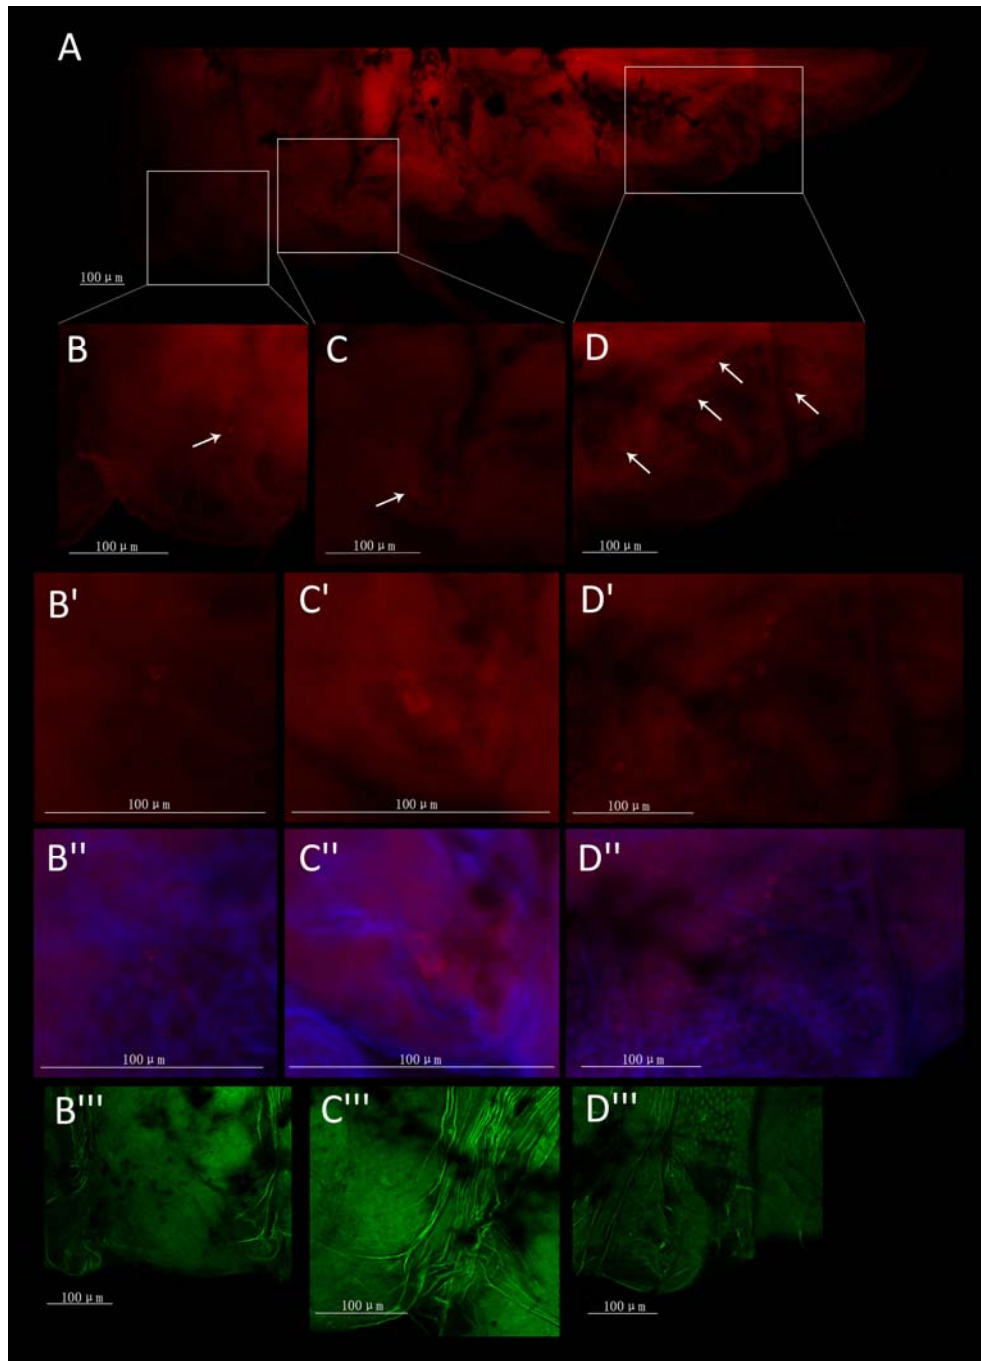

Supplementary Figure 19 *Abd-A* localization in the abdomen of J1 larva of *E.*

*sinensis*. The *Abd-A* mRNA primarily located in the second, third, sixth ventral segment and the caudal segment (arrows). The result showed the weaker positive signal than LM larva. A. Abdomen of J1 larva; B. The second ventral segment of J1 larva; C. The third ventral segment of J1 larva; D. The sixth ventral segment and the caudal segment of J1 larva; B'-D'. Figure B-D amplification; B''-D''. Merge for 5-FAM and DAPI stained picture; B'''-D''' . Control group with GFP mRNA probe; arrows indicate positive position; scale table shows 100  $\mu$ M. This experiment was repeated three times independently with similar results.







**Supplementary Figure 20. Alignments of nucleotides of four Hth transcripts in *E. sinensis*.**

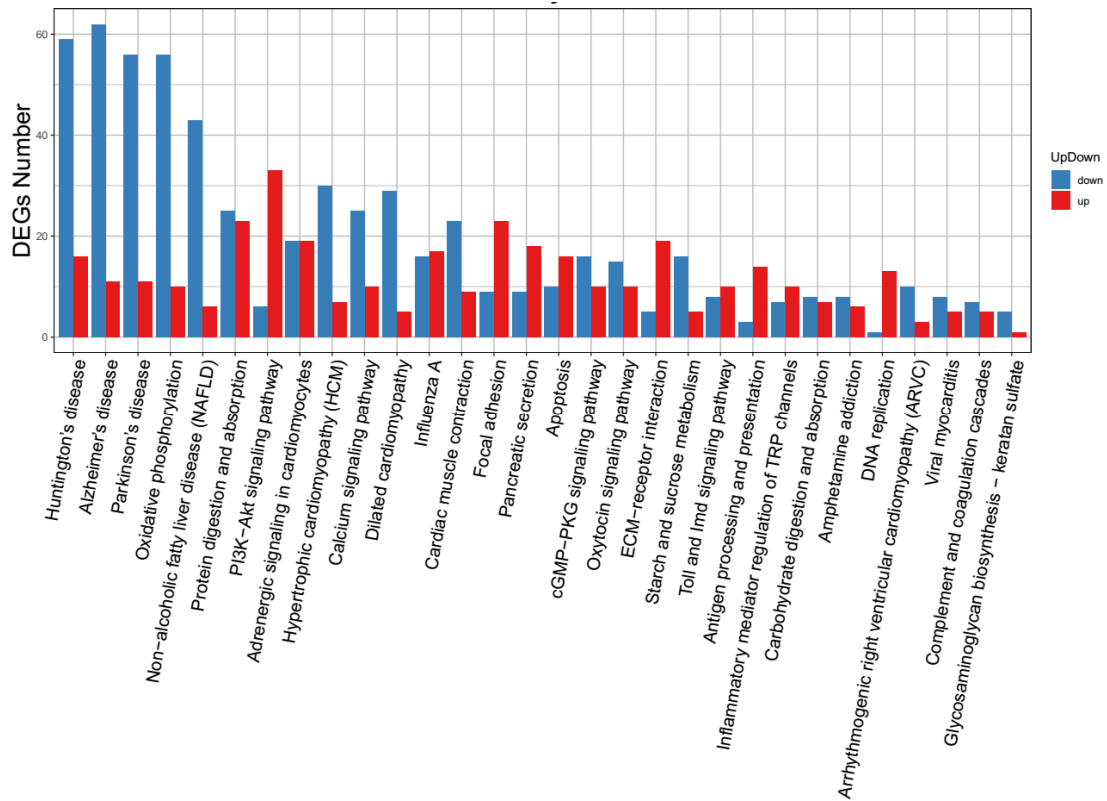

**Supplementary Figure 21. The enriched KEGG pathway of differentially expressed genes in the abdomen of *E. sinensis* from the LM to J1 stage.**

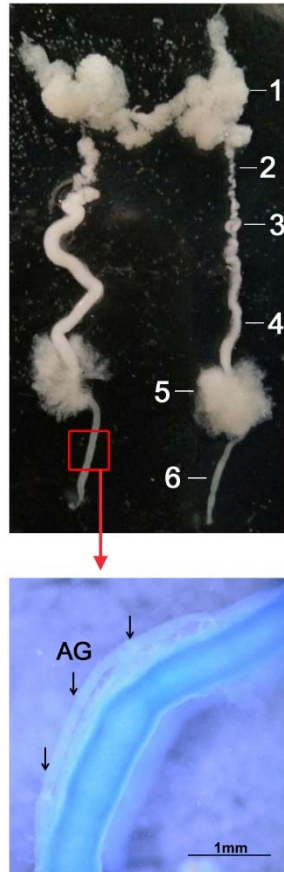

**Supplementary Figure 22. Morphology of the male reproductive system structure of *E. sinensis* and microstructure of androgenic gland (AG).** 1: testis; 2: vas efferens; 3: vas deferens; 4: seminal vesicle; 5: accessory sex gland; 6: ejaculatory duct. Vas efferens, vas deferens and seminal vesicle are known as the sperm-duct. A pair of AGs is attached to the surface of the ejaculatory duct.

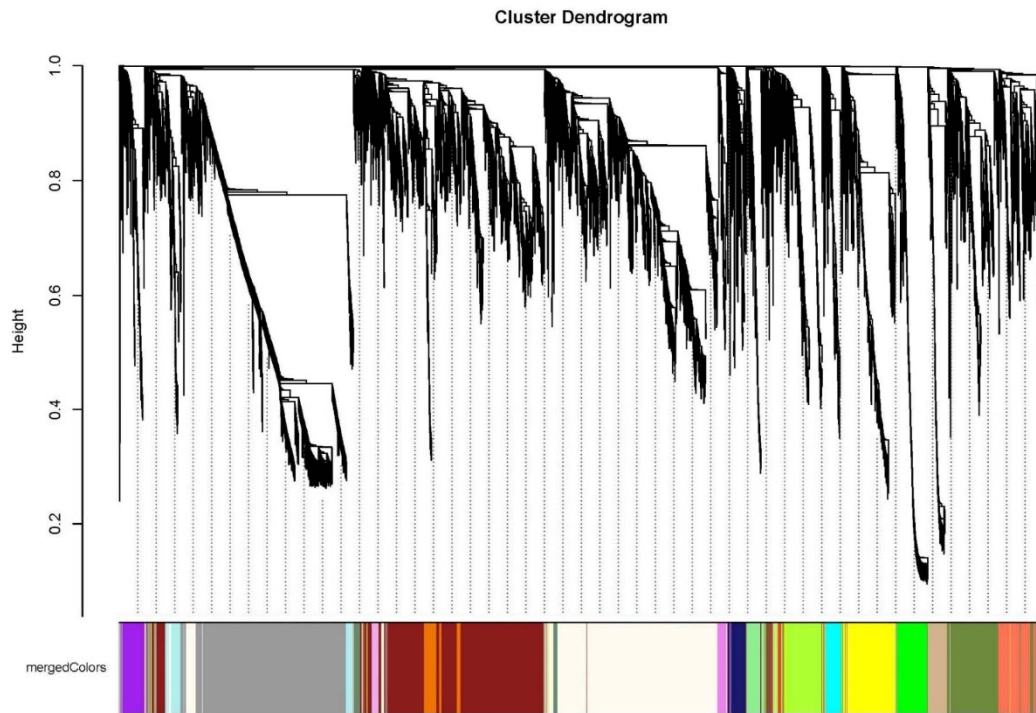

**Supplementary Figure 23. Construction of gene co-expression network based on 29 transcriptomes from life history stages and adult tissues.** Dendrograms were produced by average linkage hierarchical clustering of genes on the basis of a topological overlap. Horizontal color bars represent different modules of co-expressed genes.

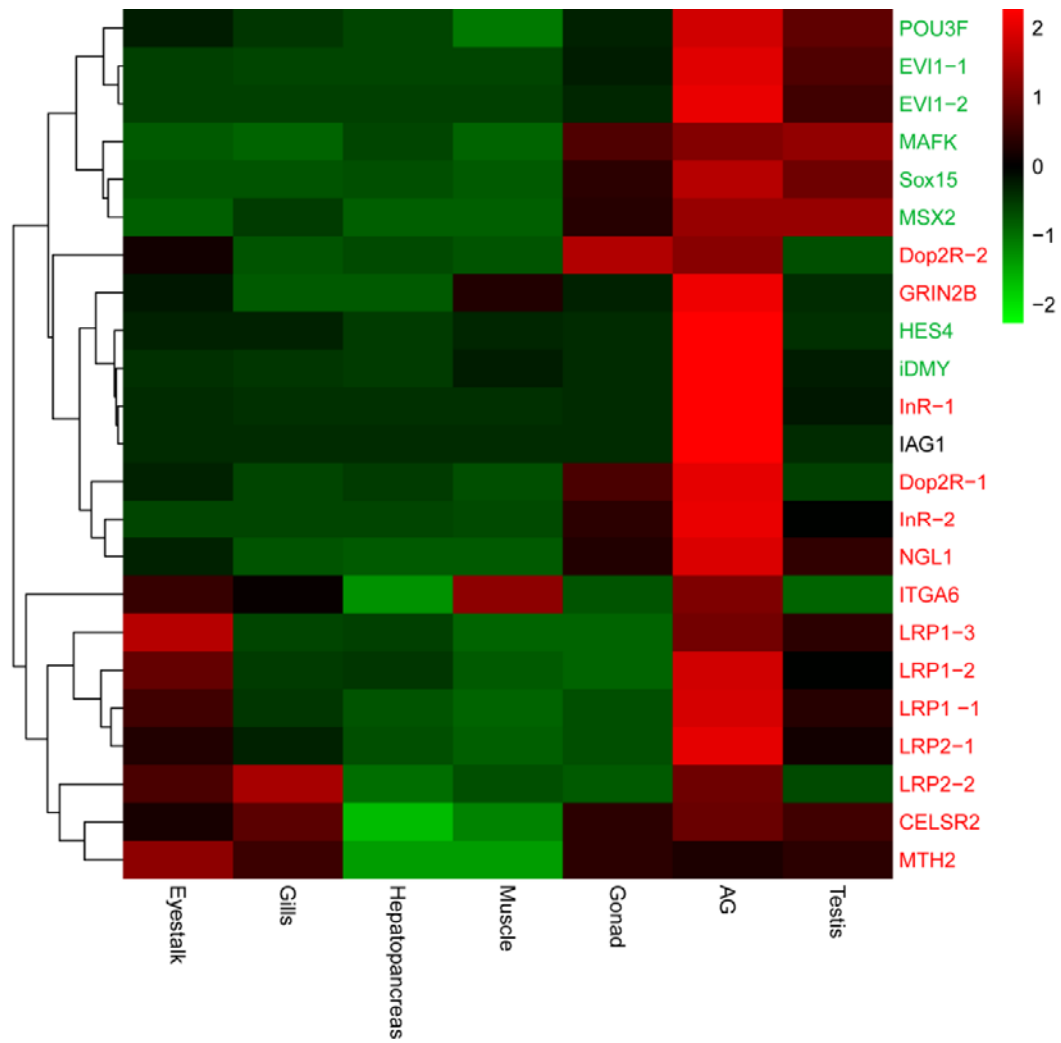

**Supplementary Figure 24.** The expression heatmap of receptors (red) and transcription factors (green) of the AG-related module in adult tissues of *E. sinensis*.

**A**

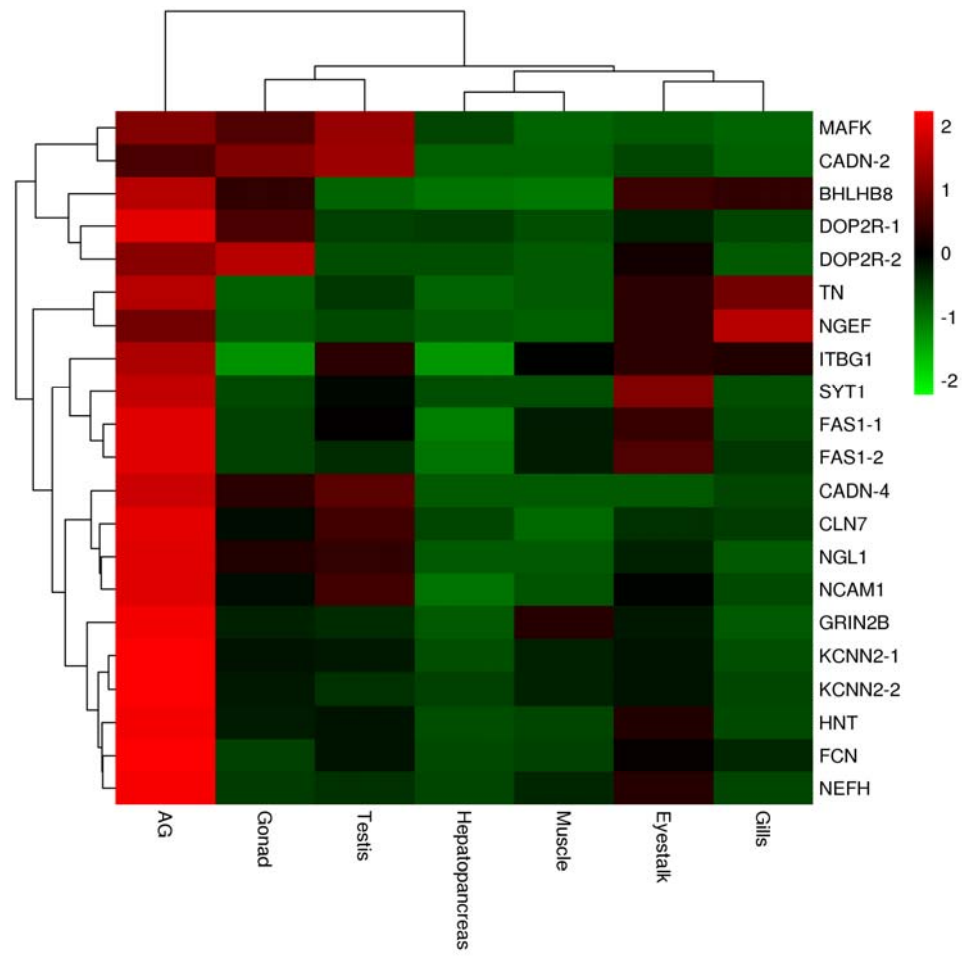

**B**

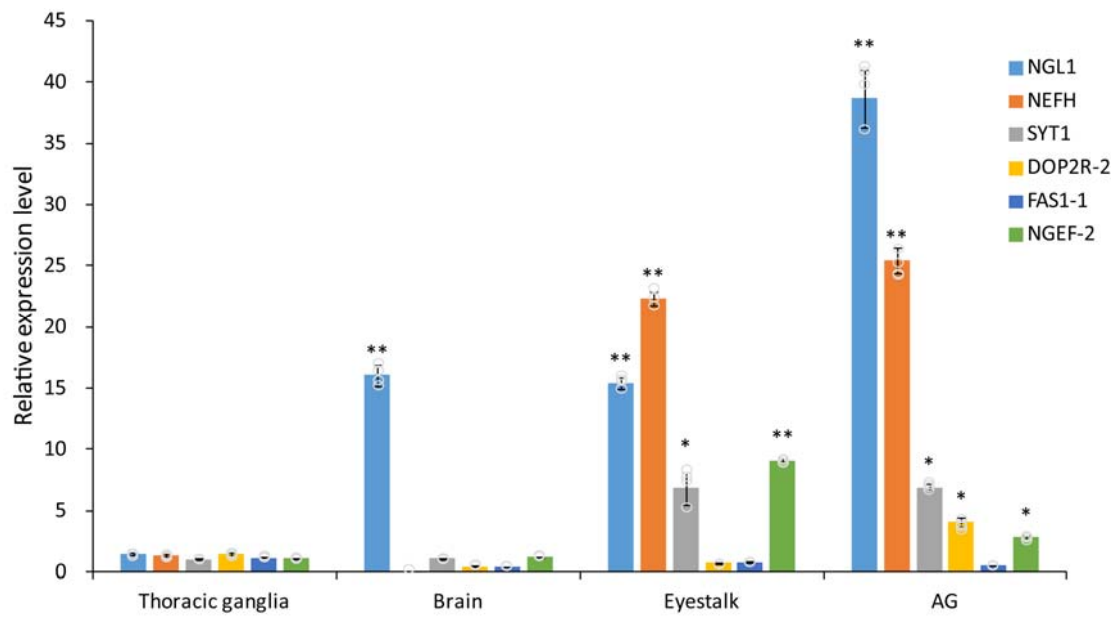

**Supplementary Figure 25. Expression of neuron or axon-related genes from the AG-related module.** The expression patterns of these genes in adult tissues (A), and in AG and other nervous tissues qPCR (B). Error bars represent the mean  $\pm$  S.D. (n = 4). Significant differences across thoracic ganglion tested by two-tailed Student's *t*-test are indicated with an asterisk at  $P < 0.05$ , and two asterisks at  $P < 0.01$ . All primer sequences are available in Supplementary Table 21.

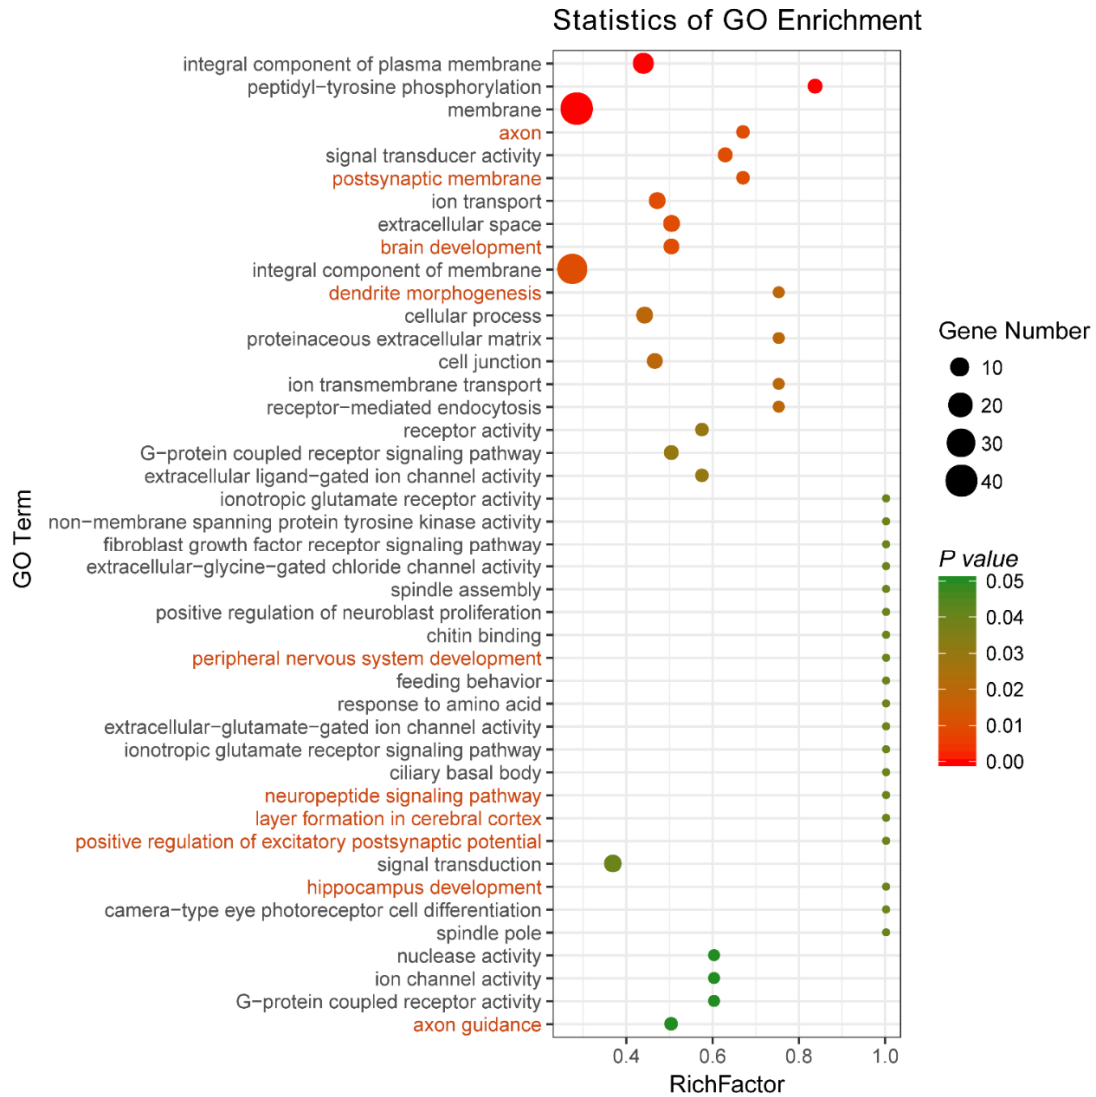

**Supplementary Figure 26. GO analysis of the target genes of differently expressed miRNAs in AG between synthesis (SY) and secretion phase (SE). The GO terms related to structures and developmental processes of nervous system are highlighted in orange.**



**A**

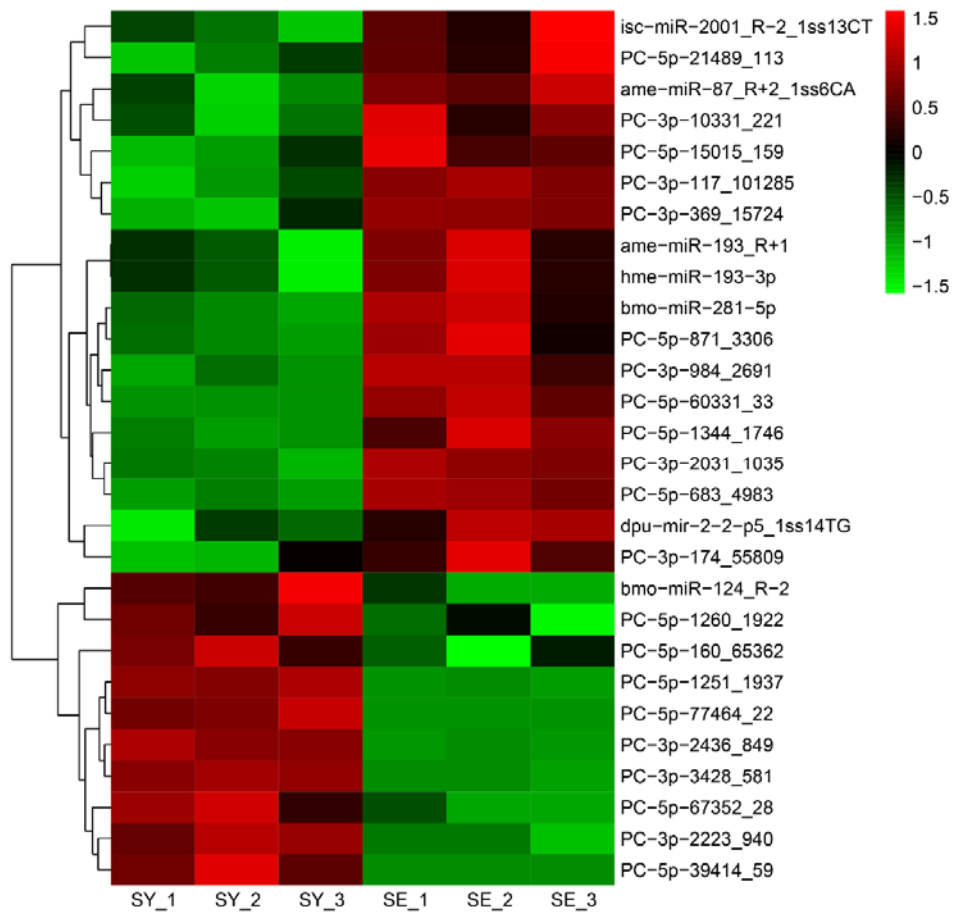

**B**

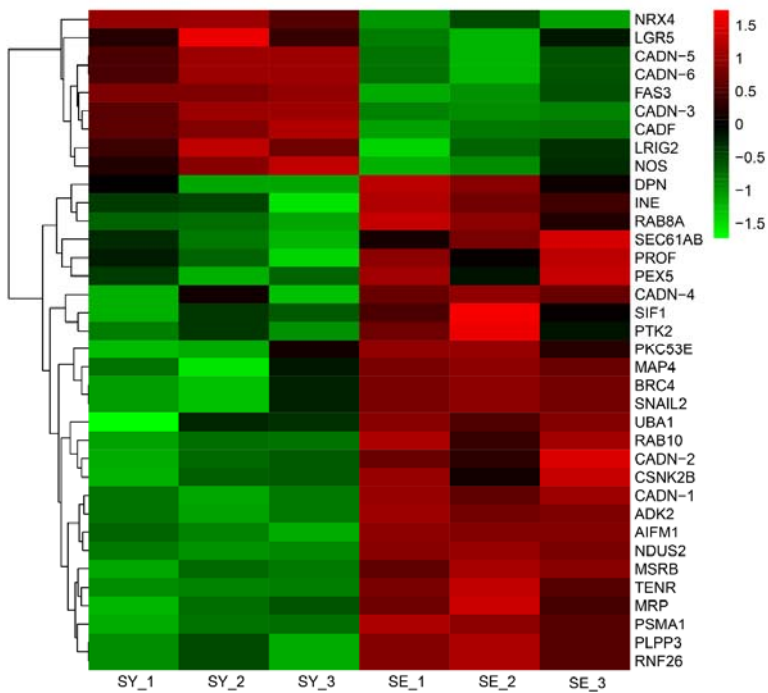

**Supplementary Figure 27. Expression profiles of the neuron-related differentially expressed miRNAs (A) and genes (B) between synthesis (SY) and secretion (SE) phase of *E. sinensis*.**

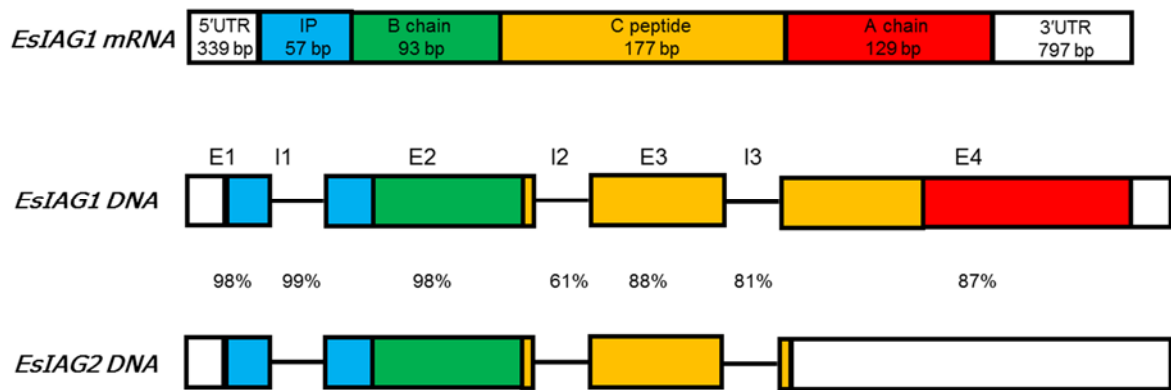

**Supplementary Figure 28. Structure of *EsIAG1* mRNA and the genomic structures of *EsIAG1* and *EsIAG2*.** The different components of *EsIAG* mRNA are shaded in different colors, and the length of each component is indicated on the figure. Exons and introns of *EsIAG1 DNA* and *EsIAG2 DNA* are indicated by the letters 'E' and 'I', respectively. The identity (in percentage) of the exons and introns between the two genomic sequences is indicated.

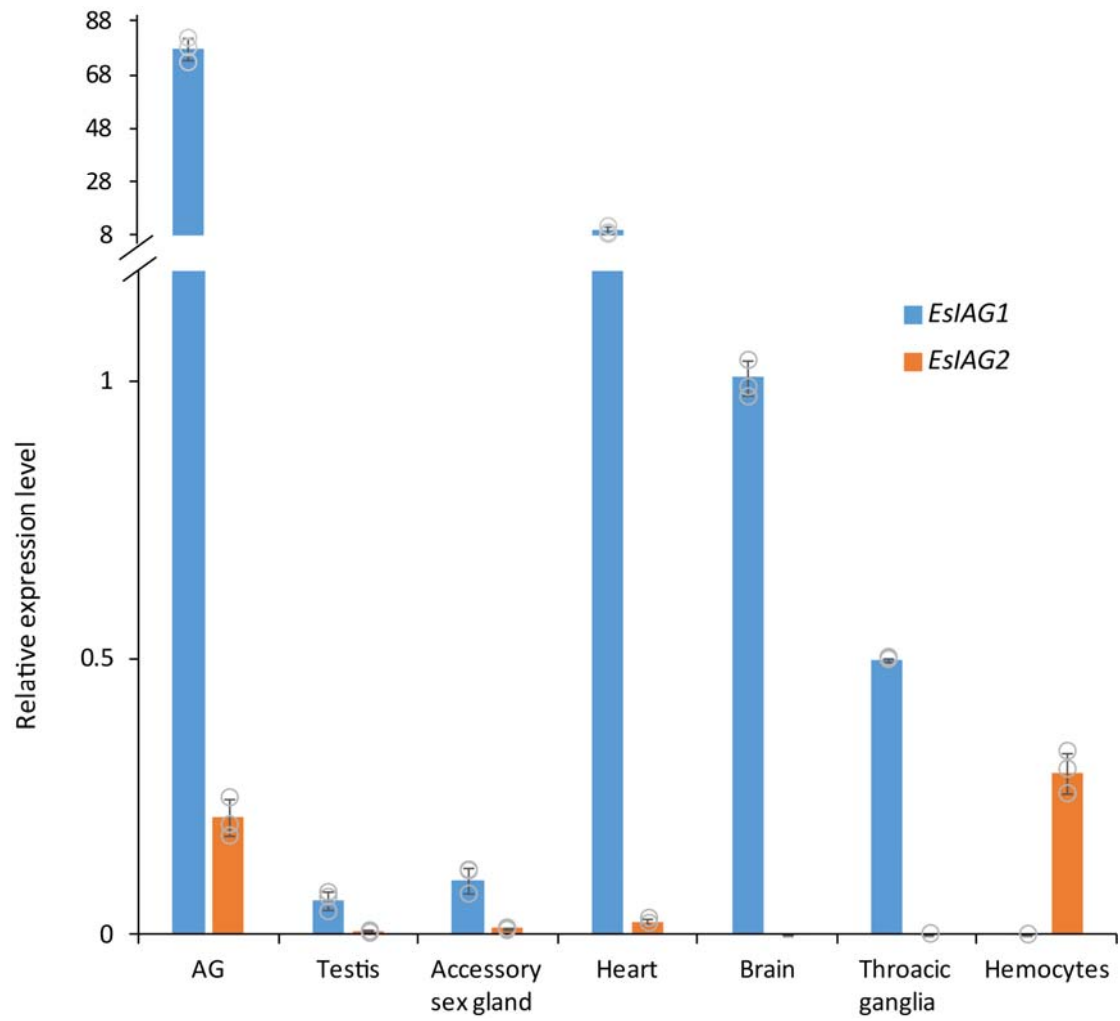

**Supplementary Figure 29. Expression pattern of *EsIAG1* and *EsIAG2* in adult tissues based on qPCR.** Error bars represent the mean  $\pm$  S.D. (n = 3). The gene-specific primer sequences are listed in Supplementary Table 21.



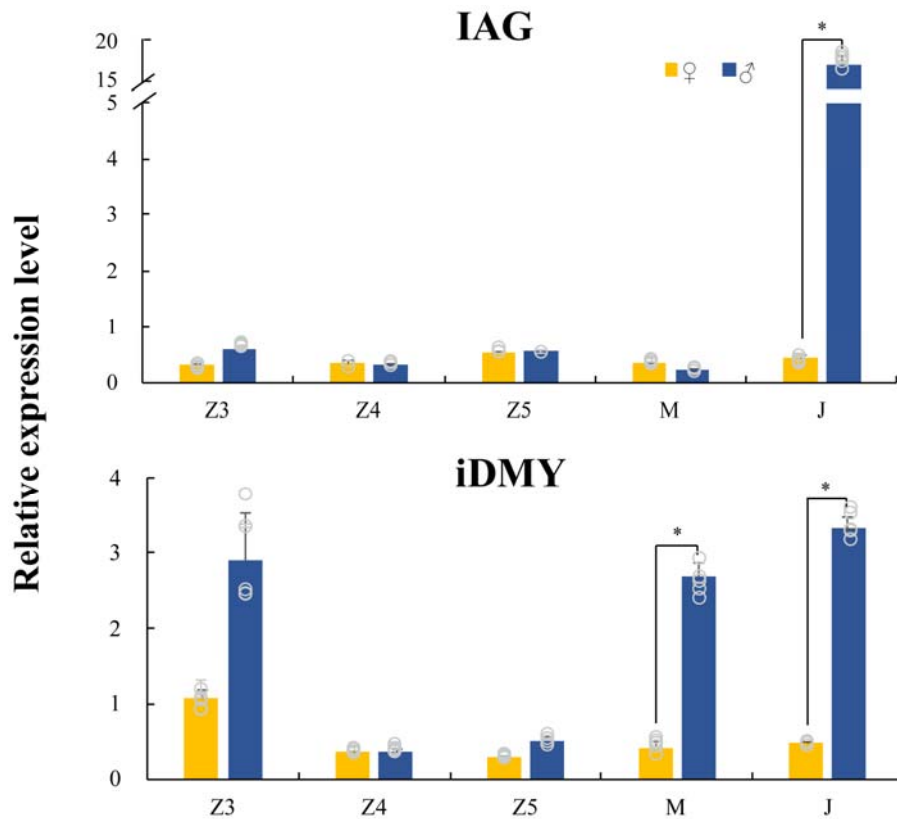

**Supplementary Figure 31. The expression pattern of *IAG* and *iDMY* in sex distinguished larva detected by qPCR with primer pairs *IAG\_RTf/ IAG\_RTR* and *iDMY\_RTf/ iDMY\_RTR*. The sex of larva was determined by two female-specific DNA markers *SM\_F1/SM\_R1* and *SM\_F2/SM\_R2*. Error bars represent the mean  $\pm$  S.D. (n = 5). Significant differences between female and male tested by two-tailed Student's *t*-test are indicated with an asterisk at  $P < 0.05$ . All primer sequences are available in Supplementary Table 21.**

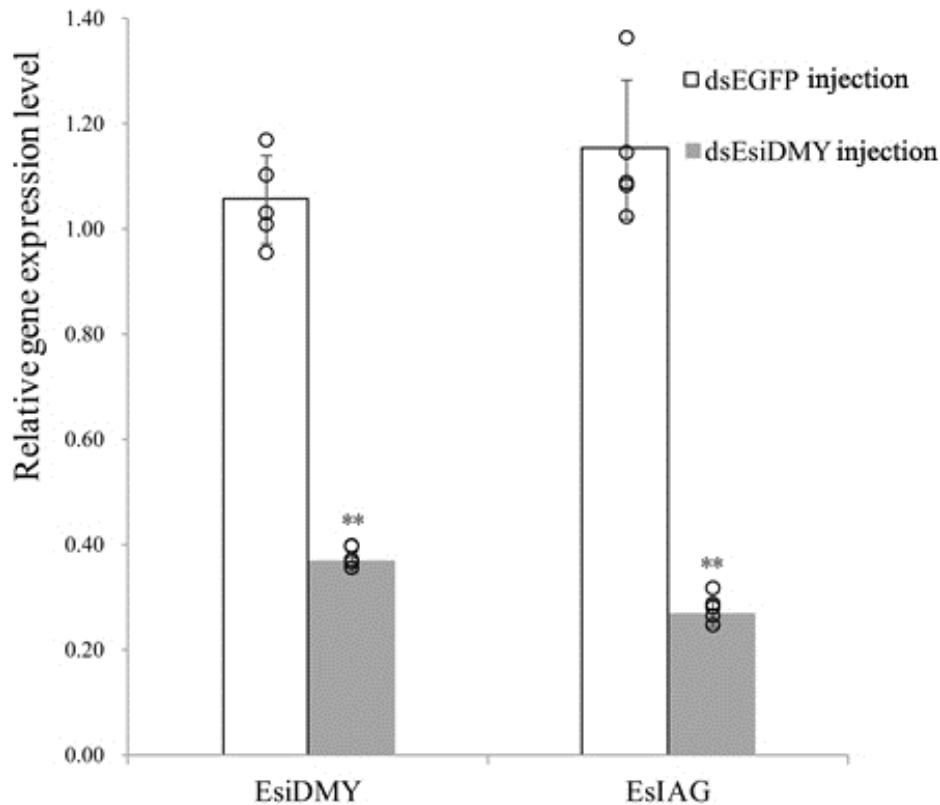

**Supplementary Figure 32. The expression pattern of iDMY and IAG in the AG after injection of dsiDMY.** 20 crabs were employed for the gene knock-down experiment. They were randomly divided into two groups and each contained 10 individuals. Crabs receiving an injection of dsiDMY dsRNA (2 $\mu$ g/g crab) resuspended in 0.1 mol/L PBS at the arthroal membrane of the last walking leg were used as challenge group, while the individuals received an injection of EGFP dsRNA (2  $\mu$ g/g crab) were used as control group. The injected crabs were returned to the water tanks and five individuals were randomly sampled at the time point of 24 h post-injection. Error bars represent the mean  $\pm$  S.D. (n = 5). Significant differences between two treatments tested by two-tailed Student's *t*-test ( $P < 0.01$ ) are shown with two asterisks (\*\*). All primer sequences are available in Supplementary Table 21.

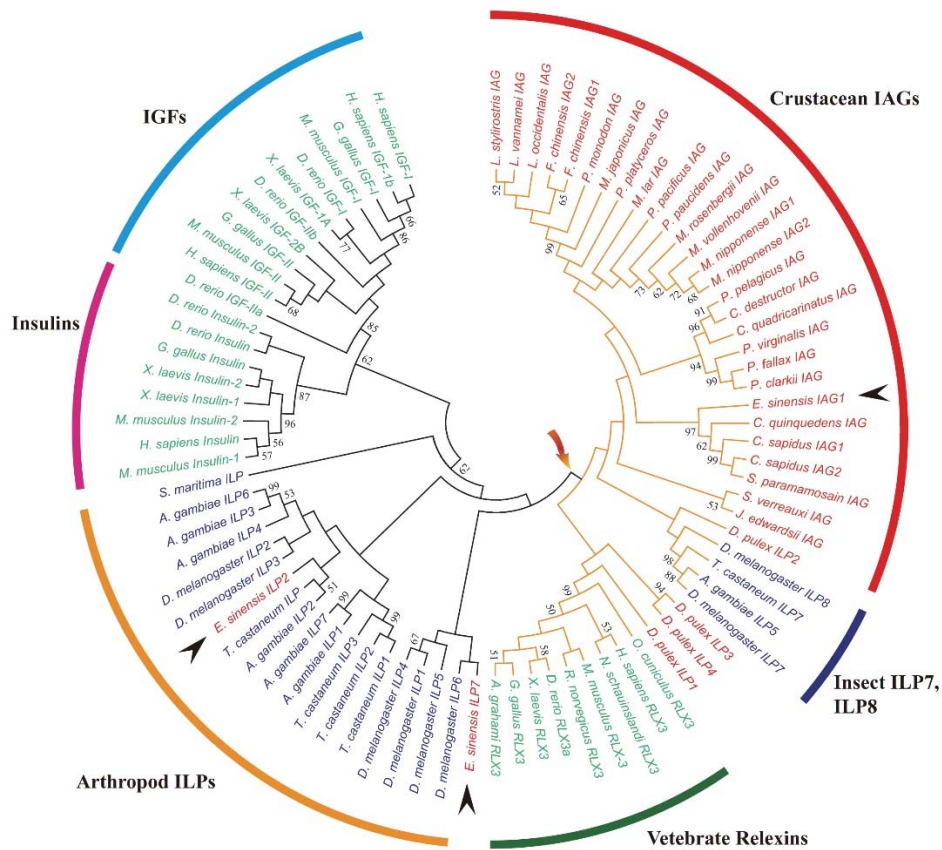

**Supplementary Figure 33. Phylogenetic tree inferred from protein sequences of insulin family from representative arthropods and vertebrates inferred by the neighbor-joining (NJ) method. Numbers in each branch indicate bootstrap values above 50%.**



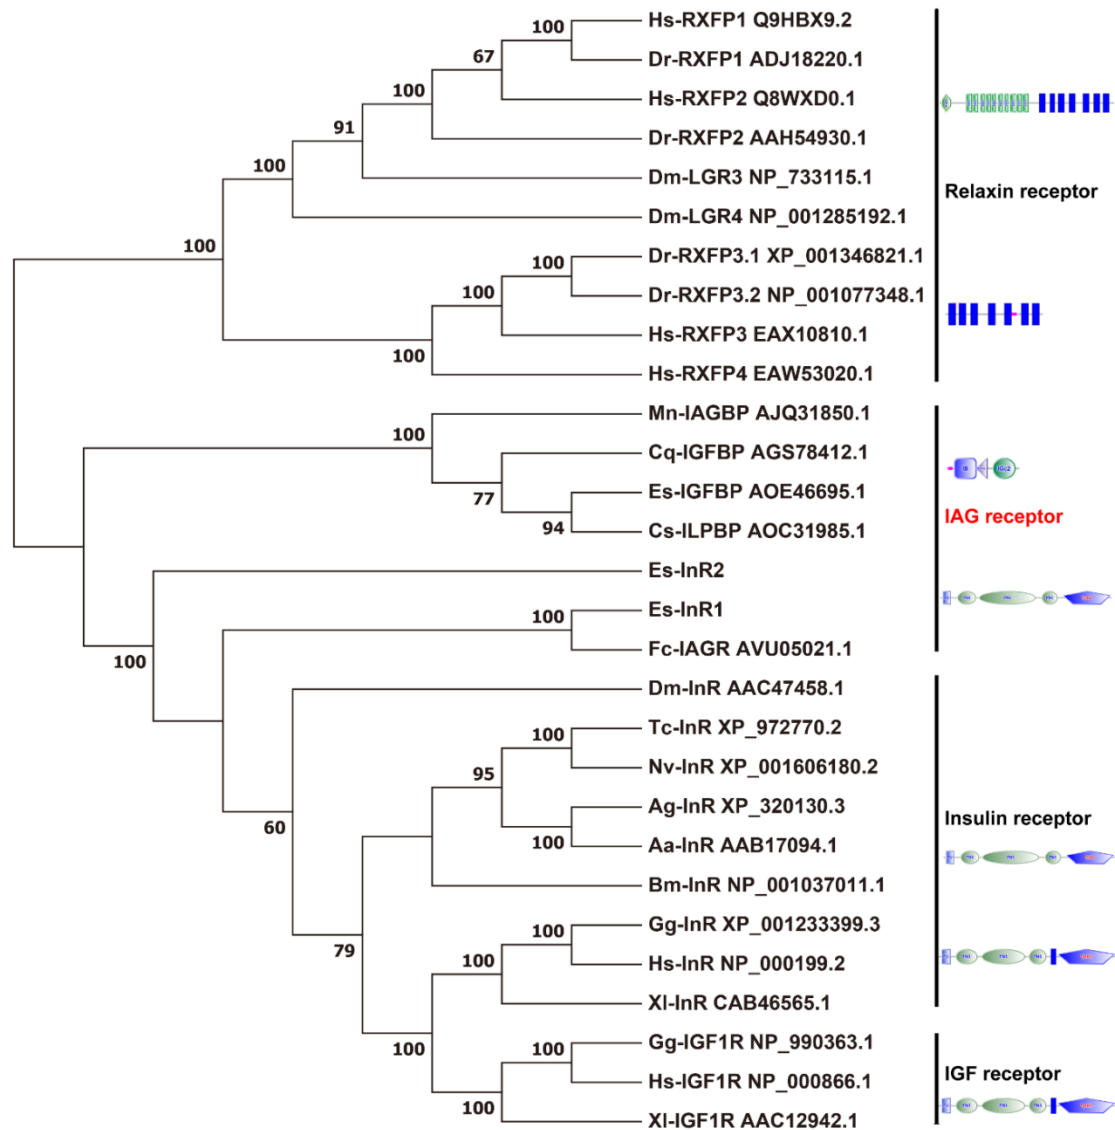

**Supplementary Figure 34. Phylogenetic analysis of insulin superfamily member receptors constructed with bootstrap NJ using MEGA 7.0.** Numbers represent percent bootstrap values; unlabeled branches indicate a value less than 50. The domains of each cluster were predicted by SMART. RXFP: relaxin receptor; LGR: leucine rich repeat containing G protein coupled receptor; IGFBP: insulin-like growth factor binding protein; ILPBP: insulin-like peptide binding protein; IGF1R: insulin-like growth factor 1 receptor; InR: insulin-like receptor. The species using in phylogenetic

tree: Hs: *Homo sapiens*; Dr: *Danio rerio*; Gg: *Gallus gallus*; Xl: *Xenopus laevis*; Dm: *Drosophila melanogaster*; Tc: *Tribolium castaneum*; Ny: *Nasonia vitripennis*; Ag: *Anopheles gambiae*; Aa: *Aedes aegypti*; Bm: *Bombyx mori*; Fc: *Fenneropenaeus chinensis*; Cs: *Callinectes sapidus*; Cq: *Cherax quadricarinatus*; Mn: *Macrobrachium nipponense*; Es: *Eriocheir sinensis*.

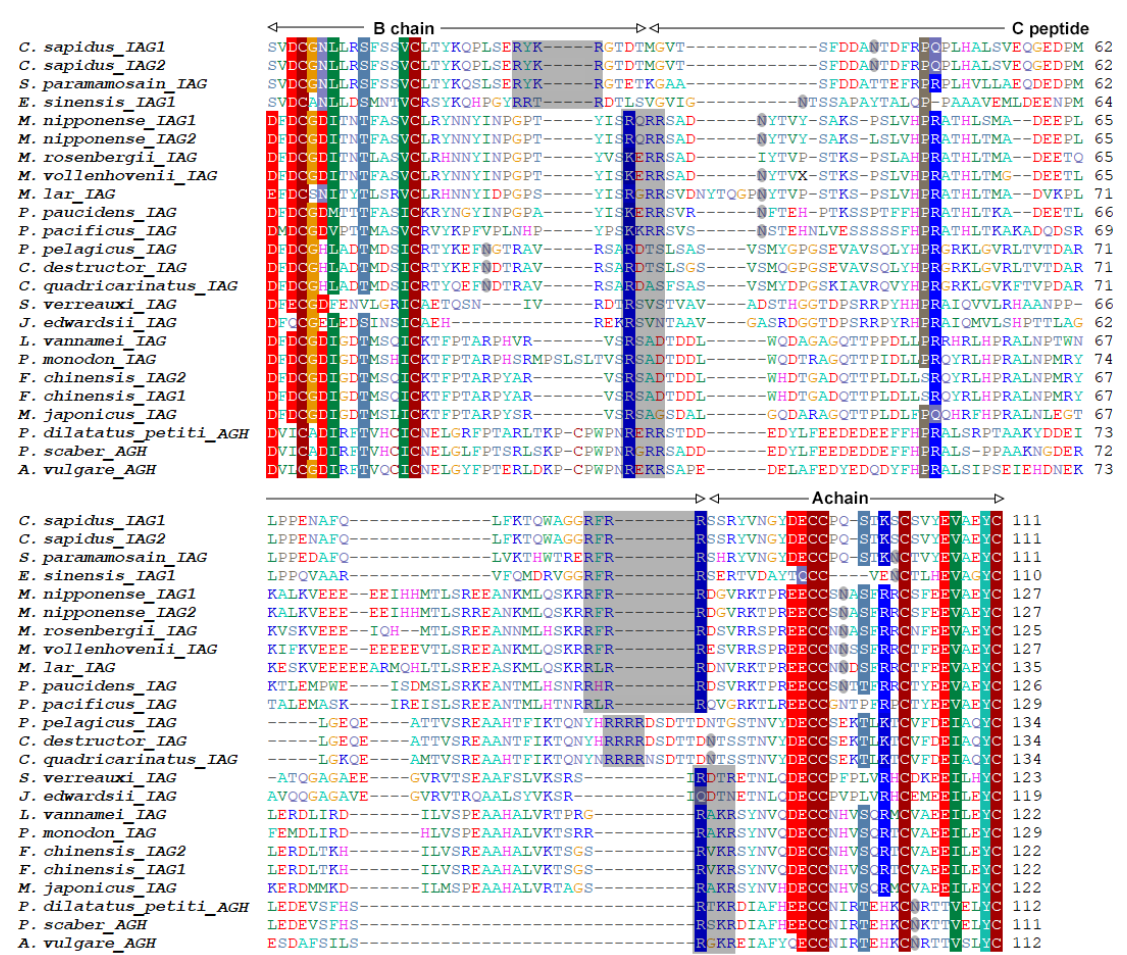

Supplementary Figure 35. Multiple sequence alignment of IAG from *E. sinensis* other species. The identity sequence is shaded with different colors. All IAGs known to date were aligned using CLUSTALX. The predicted cleavage sites (RxxR, KxxR or

xR) are shown with gray box. The most conserved feature is the backbone consisting of six cysteine residues, which give rise to disulfide bridges (black lines, C1-C4, C2-C6, C3-C5 for decapod IAG, and C1-C3, C2-C6, C4-C5 for isopod AGH). Two other cysteine residues that form a second inter-chain disulfide bridge in the isopod species are also highlighted. N-glycosylation sites with the sequence of NxS/T are highlighted with gray circles.

## Supplementary Tables

**Supplementary Table 1. Statistics of the genome sequencing data of *E. sinensis*.**

|              | Library | Read length (bp) | Clean data (Gb) | Sequencing depth* | GC (%) |
|--------------|---------|------------------|-----------------|-------------------|--------|
| Illumina     | 250 bp  | PE150            | 68.36           | 47.14             | 45.04  |
|              | 500 bp  |                  | 128.30          | 88.48             | 44.73  |
|              | 800 bp  |                  | 101.00          | 69.66             | 43.42  |
|              | 2 kb    | PE125            | 36.11           | 24.90             | 45.55  |
|              | 5 kb    |                  | 26.64           | 18.37             | 46.46  |
|              | 10 kb   |                  | 13.75           | 9.48              | 49.43  |
|              | Total   |                  | 374.16          | 258.04            | -      |
| PacBio       |         |                  | 51.31           | 35.39             | 39.00  |
| 10× Genomics |         | PE150            | 154.10          | 106.35            | 48.70  |

PE: paired-end.

\* Based on the estimated genome size of 1.45 Gb according to *k*-mer analysis.

**Supplementary Table 2. Summary statistics of the assembled *E. sinensis* genome.**

|                                                         | Allpaths      | N50 (bp)   | N50 no. | N90 (bp) | N90 no. | Longest (bp) | Total length (bp) |
|---------------------------------------------------------|---------------|------------|---------|----------|---------|--------------|-------------------|
| Our assembled genome                                    | Contig        | 26,045     | 12,722  | 2,670    | 65,176  | 1,457,336    | 1,293,881,449     |
|                                                         | Scaffold      | 150,053    | 2,235   | 9,448    | 17,979  | 50,504,686   | 1,562,256,418     |
|                                                         | Hi-C Scaffold | N50 (bp)   | N50 no. | N90 (bp) | N90 no. | Longest (bp) | Total length (bp) |
|                                                         |               | 17,127,685 | 30      | 9,466    | 7,204   | 50,864,308   | 1,567,615,418     |
| Previously published genome by Tang et al. <sup>1</sup> |               | N50 (bp)   | N50 no. | N90 (bp) | N90 no. | Longest (bp) | Total length (bp) |
|                                                         |               | 3,185,988  | 94      | 80,260   | 1,368   | 16,811,200   | 1,270,960,592     |
| Previously published genome by Song et al. <sup>2</sup> |               | N50 (bp)   | N50 no. | N90 (bp) | N90 no. | Longest (bp) | Total length (bp) |
|                                                         |               | 111,755    | 2,066   | 144      | 772,162 | 2,002,076    | 1,118,179,523     |

**Supplementary Table 3. Assembly statistics of several crustacean genomes.**

| Species                          | Class        | Order           | Chromosome no. | Genome size (bp)     | Contig N50 (bp) | Scaffold N50 (bp) |
|----------------------------------|--------------|-----------------|----------------|----------------------|-----------------|-------------------|
| <i>Daphnia pulex</i>             | Branchiopoda | Diplostraca     | 2n=24          | 197,206,209          | 49,250          | 642,089           |
| <i>Eulimnadia texana</i>         | Branchiopoda | Diplostraca     |                | 120,535,642          | 18,070,303      | 10,428,323        |
| <i>Eurytemora affinis</i>        | Hexanauplia  | Calanoida       |                | 389,032,277          | 67,724          | 252,275           |
| <i>Tigriopus californicus</i>    | Hexanauplia  | Harpacticoida   |                | 191,142,5ds 46       | 44,438          | 15,806,032        |
| <i>Hyalella azteca</i>           | Malacostraca | Amphipoda       |                | 550,885,727          | 114,415         | 215,427           |
| <i>Parhyale hawaiiensis</i>      | Malacostraca | Amphipoda       | 2n=46          | 4023,757,376         | 4,009           | 69,178            |
| <i>Armadillidium vulgare</i>     | Malacostraca | Isopoda         | 2n=54          | 1,725,108,002        | 38,359          | 51,088            |
| <i>Litopenaeus vannamei</i>      | Malacostraca | Decapoda        | 2n=44          | 1,663,559,157        | 57,650          | 605,555           |
| <b><i>Eriocheir sinensis</i></b> | Malacostraca | <b>Decapoda</b> | <b>2n=146</b>  | <b>1,567,615,418</b> | <b>26,045</b>   | <b>17,127,685</b> |
| <i>Portunus trituberculatus</i>  | Malacostraca | Decapoda        | 2n=106         | 1 005,046,021        | 4,121,416       | 21,793,880        |
| <i>Procambarus virginalis</i>    | Malacostraca | Decapoda        | 2n=184         | 3,290,470,695        | 1,187           | 39,275            |

**Supplementary Table 4. Alignment of short reads by BWA.**

|                          | PE250       | PE500       |
|--------------------------|-------------|-------------|
| No. of reads (bp)        | 577,839,645 | 597,978,348 |
| No. of mapped reads (bp) | 539,641,541 | 556,923,825 |
| Mapping rate (%)         | 93.39       | 93.13       |

**Supplementary Table 5. PCR primers and results for validation of contigs.**

| Primer name | Primer sequences (5'-3') | Amplification | Sequencing | Identity |
|-------------|--------------------------|---------------|------------|----------|
| C1-F        | ACGGACGGAGGAAGAGAAGGG    | Failed        |            |          |
| C1-R        | AAGGTGGTGGGCGAATGGAAT    |               |            |          |
| C2-F        | AGAGAGGTGACCAATGGATGC    | Yes           | Yes        | 98%      |
| C2-R        | CGCTGTGTTACTGAGGACGAA    |               |            |          |
| C3-F        | AATGTGGCTTGATGGTTAC      | Yes           | Yes        | 100%     |
| C3-R        | ATGATGGTGGTGTTTTTGA      |               |            |          |
| C4-F        | CCCCAAAGAGAGTCCAATCG     | Yes           | Yes        | 96%      |
| C4-R        | GGCTCATCAGGGCTAACAAA     |               |            |          |
| C5-F        | GGTGAAGGTTGGTTTGC GA     | Yes           | Yes        | 99%      |
| C5-R        | GACGAGGAGGGTGTGTGCT      |               |            |          |
| C6-F        | TTTTTCTGGTGTGTTCCGGTA    | Yes           | Yes        | 97%      |
| C6-R        | TCGTTCAATTTGTGTTGGTTC    |               |            |          |
| C7-F        | GACAGGAAAAAGAGAAGAAC     | Yes           | Yes        | 99%      |
| C7-R        | GAGGACAATAACGGAGAAAAG    |               |            |          |
| C8-F        | ATCCTATGCCCATTCACCCT     | Yes           | Yes        | 99%      |
| C8-R        | GCAGCTCCCAATTCCTTCGT     |               |            |          |
| C9-F        | GAAGGCTGGGTCAGTGTTTA     | Yes           | Yes        | 96%      |
| C9-R        | GAGTGAGTTGGGAGTGTGTG     |               |            |          |
| C10-F       | CTATGCGTTGGCTGTCTGT      | Yes           | Yes        | 95%      |
| C10-R       | TTTTGGGCGATTTTAATCT      |               |            |          |
| C11-F       | ATGGGCTGAAGGGAAAATGA     | Yes           | Yes        | 98%      |
| C11-R       | AAGGAGCGGGTAGCGAACTG     |               |            |          |
| C12-F       | TAAAAGGTTACGAGTAGGG      | Yes           | Yes        | 99%      |
| C12-R       | TTGTGGTAGGTAACAGGCAG     |               |            |          |
| C13-F       | GAGCCCGTCTGTTTTATCCTG    | Yes           | Yes        | 93%      |
| C13-R       | TACGCCTCTACCACTTCCCTG    |               |            |          |
| C14-F       | CCACATCCATCCCTCACATCA    | Yes           | Yes        | 99%      |
| C14-R       | CACCTATCCTCACCGCCCTAT    |               |            |          |
| C15-F       | GGAGGTGAGGTGCGATTGC      | Yes           | Yes        | 99%      |
| C15-R       | TCGTCGGCTGCTGGGTGTC      |               |            |          |
| C16-F       | AAGAGTCAGAGGGGGGATTA     | Yes           | Yes        | 99%      |
| C16-R       | GTGGTAGAACTATGCGTGGC     |               |            |          |
| C17-F       | CACTGCTTACCTACTTGCCT     | Yes           | Yes        | 98%      |
| C17-R       | CGTGTTGCTGTATATTGACG     |               |            |          |
| C18-F       | AGGGTCAAAGAGGGTATGGA     | Yes           | Yes        | 96%      |
| C18-R       | TGAGCGGTATTTAGCGGAGA     |               |            |          |

**Supplementary Table 6. Evaluation of gene coverage using complete CDS sequences in GenBank and assembled transcriptomic datasets by Illumina sequencing.**

| Dataset        |         | Number | Total length (bp) | Covered by assembly (%) | with >50% sequence in one scaffold |            |
|----------------|---------|--------|-------------------|-------------------------|------------------------------------|------------|
|                |         |        |                   |                         | Number                             | Percentage |
| CDS            | All     | 274    | 479,268           | 90.60                   | 250                                | 91.24      |
|                | >200bp  | 273    | 479,091           | 90.64                   | 250                                | 91.58      |
|                | >500bp  | 272    | 478,634           | 90.65                   | 249                                | 91.54      |
|                | >1000bp | 193    | 419,270           | 90.95                   | 176                                | 91.19      |
| Transcriptomes | >0bp    | 71,490 | 49,722,571        | 95.42                   | 65,167                             | 91.16      |
|                | >200bp  | 71,490 | 49,722,571        | 95.42                   | 65,167                             | 91.16      |
|                | >500bp  | 24,704 | 35,856,995        | 98.19                   | 22,783                             | 92.22      |
|                | >1000bp | 12,249 | 27,252,964        | 99.09                   | 11,249                             | 91.84      |

**Supplementary Table 7. BUSCO-based assessment of *E. sinensis* genome assembly based on arthropod and eukaryotic single-copy orthologs.**

| Gene set  | BUSCO assessment results                              |
|-----------|-------------------------------------------------------|
| Arthropod | C:85.9% [S: 82.6%, D: 3.3%], F: 4.2%, M: 9.9%, N:1066 |
| Eukaryote | C:84.9% [S: 76.6%, D: 8.3%], F: 6.3%, M: 8.8%, N:303  |

Note: C, S, D, F and M stand for complete, complete and single-copied, complete but duplicated, fragmented, and missing orthologs in the assembled genome, respectively. N represents the total number of BUSCO arthropod and eukaryote (v. 2) genes.

**Supplementary Table 8. Comparison of gene characteristics in *E. sinensis* and eight other arthropods.**

| Species                        | Number | Average transcript length (bp) | Average CDS length (bp) | Average exon number per gene | Average exon length (bp) | Average intron length (bp) |
|--------------------------------|--------|--------------------------------|-------------------------|------------------------------|--------------------------|----------------------------|
| <i>Eriocheir sinensis</i>      | 28,033 | 5,017                          | 1,078                   | 3.26                         | 330                      | 1,602                      |
| <i>Litopenaeus vannamei</i>    | 25,596 | 8,889                          | 1,546                   | 5.94                         | 260                      | 1,484                      |
| <i>Parhyale hawaiiensis</i>    | 30,603 | 17,955                         | 2,041                   | 3.64                         | 220                      | 6,068                      |
| <i>Daphnia pulex</i>           | 30,907 | 2,009                          | 976                     | 4.62                         | 211                      | 285                        |
| <i>Drosophila melanogaster</i> | 13,689 | 4,261                          | 1,621                   | 3.97                         | 408                      | 888                        |
| <i>Anopheles gambiae</i>       | 14,324 | 5,955                          | 1,583                   | 4.21                         | 376                      | 1,363                      |
| <i>Apis mellifera</i>          | 11,062 | 8,976                          | 1,627                   | 6.46                         | 252                      | 1,347                      |
| <i>Bombyx mori</i>             | 14,623 | 6,030                          | 1,224                   | 5.44                         | 225                      | 1,082                      |
| <i>Tribolium castaneum</i>     | 16,531 | 5,289                          | 1,351                   | 4.34                         | 311                      | 1,179                      |
| <i>Locusta migratoria</i>      | 17,307 | 54,341                         | 1,160                   | 5.77                         | 201                      | 11,159                     |



**Supplementary Table 9. Summary of functional gene annotation of *E. sinensis*.**

|           |                 | Number | Percentage (%) |
|-----------|-----------------|--------|----------------|
| Total     |                 | 28,033 | 100            |
| Annotated | Nr              | 25,496 | 90.95          |
|           | Nt              | 23,870 | 85.15          |
|           | Swissprot       | 21,523 | 76.78          |
|           | COG             | 16,106 | 57.45          |
|           | KOG             | 20,361 | 72.63          |
|           | KEGG            | 19,667 | 70.16          |
|           | TrEMBL          | 21,845 | 77.93          |
|           | Iprscan         | 17,923 | 63.94          |
|           | GO              | 8,965  | 31.98          |
|           | Total annotated | 26,117 | 93.17          |
|           | Unannotated     | 1,916  | 6.83           |

**Supplementary Table 10. Statistics of repetitive elements detected in the genomes of *E. sinensis* and five other crustaceans.**

|                    |               | <i>Eriocheir sinensis</i> |             | <i>Litopenaeus vannamei</i> |               | <i>Parhyale hawaiiensis</i> |             | <i>Hyalella azteca</i> |             | <i>Daphnia pulex</i> |             | <i>Eulimnadia texana</i> |             |
|--------------------|---------------|---------------------------|-------------|-----------------------------|---------------|-----------------------------|-------------|------------------------|-------------|----------------------|-------------|--------------------------|-------------|
| Type               |               | Length (bp)               | % in genome | Length (bp)                 | % in genome   | Length (bp)                 | % in genome | Length (bp)            | % in genome | Length (bp)          | % in genome | Length (bp)              | % in genome |
| Tandem repeat      | Microsatelite | 108,114,705               | 6.92        | 398,261,610                 | 23.98         | 10,706,649                  | 0.27        | 17,653,639             | 0.32        | 1,180,769            | 0.60        | 2,044,770                | 1.69        |
|                    | Total         | 266,181,071               | 17.04       | 592,547,665                 | 35.62         | 111,740,425                 | 2.78        | 49,009,981             | 8.90        | 3,880,678            | 1.97        | 16,583,425               | 13.76       |
| Interpersed repeat | DNA           | 223,157,308               | 14.28       | 529,392,649                 | 31.82         | 474,227,451                 | 11.79       | 48,059,508             | 8.72        | 8,499,275            | 4.31        | 17,445,139               | 14.47       |
|                    | LINE          | 345,082,295               | 22.09       | 326,660,747                 | 19.64         | 585,423,893                 | 14.55       | 52,148,630             | 9.47        | 3,861,524            | 1.96        | 6,357,572                | 5.27        |
|                    | SINE          | 2,744,831                 | 0.18        | 1,039,518                   | 0.06          | 1,294,093                   | 0.03        | 117,002                | 0.02        | 1,837,683            | 0.93        | 360,649                  | 0.30        |
|                    | LTR           | 247,027,252               | 15.81       | 154,329,881                 | 9.28          | 516,122,825                 | 12.83       | 42,696,907             | 7.75        | 28,964,893           | 14.69       | 9,063,538                | 7.52        |
|                    | Other         | 26,769                    | 0           | 198                         | 0.00          | 28,117                      | 0           | 23,419                 | 0.00        | 9,784                | 0           | 3,996                    | 0.00        |
|                    | Unknown       | 7,733,151                 | 0.49        | 44,024,941                  | 2.65          | 186,011,998                 | 4.62        | 20,543,007             | 3.73        | 12,196,544           | 6.18        | 11,099,565               | 9.21        |
|                    | Total         | 566,691,563               | 36.27       | 744,011,150                 | 44.72         | 1,501,490,581               | 37.32       | 141,588,200            | 25.70       | 50,986,612           | 25.85       | 35,815,882               | 29.71       |
| Total              | 707,661,693   | 45.3                      | 899,214,214 | 54.05                       | 1,604,189,772 | 39.87                       | 188,496,585 | 34.22                  | 52,769,598  | 26.76                | 43,622,227  | 36.19                    |             |

**Supplementary Table 11. Statistics of microsatellites detected in *E. sinensis* genome.**

| Type            | Intergenic  |          | Intron      |          | Exon        |          | Total       |          |
|-----------------|-------------|----------|-------------|----------|-------------|----------|-------------|----------|
|                 | Length (bp) | % in TRs | Length (bp) | % in TRs | Length (bp) | % in TRs | Length (bp) | % in TRs |
| Mononucleotide  | 603,854     | 0.23     | 434,463     | 0.16     | 229         | 0        | 1,038,546   | 0.39     |
| Dinucleotide    | 38,477,719  | 14.46    | 30,108,057  | 11.31    | 3,623       | 0        | 68,589,399  | 25.77    |
| Trinucleotide   | 12,635,167  | 4.75     | 11,137,892  | 4.18     | 31,149      | 0.01     | 23,804,208  | 8.94     |
| Tetranucleotide | 3,472,623   | 1.3      | 3,513,615   | 1.32     | 1,052       | 0        | 6,987,290   | 2.63     |
| Pentanucleotide | 2,321,092   | 0.87     | 2,708,158   | 1.02     | 845         | 0        | 5,030,095   | 1.89     |
| Hexanucleotide  | 1,375,166   | 0.52     | 1,284,521   | 0.48     | 5,480       | 0        | 2,665,167   | 1        |

TRs: tandem repeats.

**Supplementary Table 12. GC-content distribution in the genomes of *E. sinensis* and other representative species.**

| Species                         | Total number of<br>200-bp windows | GC < 20%  |                | 20% ≤ GC ≤ 60% |                | GC > 60% |                |
|---------------------------------|-----------------------------------|-----------|----------------|----------------|----------------|----------|----------------|
|                                 |                                   | Number    | Percentage (%) | Number         | Percentage (%) | Number   | Percentage (%) |
| <i>E. sinensis</i>              | 6,354,484                         | 285,165   | 4.49           | 5,771,617      | 90.83          | 297,702  | 4.68           |
| <i>Portunus trituberculatus</i> | 5,676,837                         | 134,906   | 2.38           | 5,390,585      | 94.96          | 151,346  | 2.67           |
| <i>Litopenaeus vannamei</i>     | 8,042,542                         | 1,090,770 | 13.56          | 6,590,652      | 81.95          | 361,120  | 4.49           |
| <i>Procambarus virginalis</i>   | 6,395,341                         | 4,609     | 0.07           | 6,192,232      | 96.82          | 198,500  | 3.10           |
| <i>Armadillidium vulgare</i>    | 8,615,545                         | 2,020,754 | 23.45          | 6,589,913      | 76.49          | 4,878    | 0.06           |
| <i>Parhyale hawaiiensis</i>     | 13,325,008                        | 3,317     | 0.02           | 13,274,754     | 99.62          | 46,937   | 0.35           |
| <i>Hyalella azteca</i>          | 2,708,485                         | 8,081     | 0.30           | 2,659,158      | 98.18          | 41,246   | 1.52           |
| <i>Eurytemora affinis</i>       | 1,941,708                         | 26,528    | 1.37           | 1,914,073      | 98.58          | 1,107    | 0.06           |
| <i>Tigriopus californicus</i>   | 940,270                           | 256       | 0.03           | 933,879        | 99.32          | 6,135    | 0.65           |
| <i>Daphnia pulex</i>            | 775,832                           | 715       | 0.09           | 766,401        | 98.78          | 8,716    | 1.12           |
| <i>Eulimnadia texana</i>        | 602,616                           | 17,358    | 2.88           | 579,528        | 96.17          | 5,730    | 0.95           |
| <i>Drosophila melanogaster</i>  | 711,377                           | 2,408     | 0.34           | 693,193        | 97.44          | 15,776   | 2.22           |
| <i>Bombyx mori</i>              | 2,092,249                         | 10,480    | 0.50           | 2,047,947      | 97.88          | 33,822   | 1.62           |
| <i>Tribolium castaneum</i>      | 756,146                           | 11,170    | 1.48           | 741,154        | 98.02          | 3,822    | 0.51           |
| <i>Tetranychus urticae</i>      | 446,365                           | 474       | 0.11           | 445,872        | 99.89          | 19       | 0.00           |
| <i>Limulus polyphemus</i>       | 8,216,301                         | 31,920    | 0.39           | 8,184,104      | 99.61          | 277      | 0.00           |
| <i>Crassostrea virginica</i>    | 3,422,691                         | 6,339     | 0.19           | 3,412,743      | 99.71          | 3,609    | 0.11           |
| <i>Strigamia maritima</i>       | 851,621                           | 13,415    | 1.58           | 835,527        | 98.11          | 2,679    | 0.31           |
| <i>Patinopecten yessoensis</i>  | 4,444,945                         | 6,105     | 0.14           | 4,434,479      | 99.76          | 4,361    | 0.10           |
| <i>Apostichopus japonicus</i>   | 3,991,296                         | 22,086    | 0.55           | 3,963,358      | 99.3           | 5,852    | 0.15           |
| <i>Branchiostoma floridae</i>   | 2,356,939                         | 477       | 0.02           | 2,336,830      | 99.15          | 19,632   | 0.83           |
| <i>Homo sapiens</i>             | 15,461,086                        | 34,496    | 0.22           | 14,962,344     | 96.77          | 464,246  | 3.00           |

**Supplementary Table 13. Overview of sample information and re-sequencing statistics.**

| Species            | Sample ID | Geographic location | Gender | Raw reads data (bp) | Raw depth | Clean reads data (bp) | Map ratio | Effective depth |
|--------------------|-----------|---------------------|--------|---------------------|-----------|-----------------------|-----------|-----------------|
| <i>E. sinensis</i> | Escm-1    | Shanghai, China     | Male   | 60,703,815,600      | 38.86     | 58,454,262,523        | 95.34%    | 37.42           |
| <i>E. sinensis</i> | Escm-2    | Shanghai, China     | Male   | 56,371,941,900      | 36.08     | 54,403,377,577        | 95.07%    | 34.82           |
| <i>E. sinensis</i> | Escm-3    | Shanghai, China     | Male   | 60,680,140,800      | 38.84     | 58,530,491,153        | 95.40%    | 37.47           |
| <i>E. sinensis</i> | Escm-4    | Shanghai, China     | Male   | 54,509,661,600      | 34.89     | 52,672,248,245        | 95.29%    | 33.72           |
| <i>E. sinensis</i> | Escm-5    | Shanghai, China     | Male   | 72,199,771,500      | 46.22     | 72,199,771,500        | 95.62%    | 46.22           |
| <i>E. sinensis</i> | Eshf-1    | Dongying, China     | Female | 61,685,059,500      | 39.48     | 59,107,774,877        | 94.94%    | 37.83           |
| <i>E. sinensis</i> | Eshf-2    | Dongying, China     | Female | 54,621,108,300      | 34.96     | 52,271,677,123        | 95.30%    | 33.46           |
| <i>E. sinensis</i> | Eshf-3    | Dongying, China     | Female | 55,246,968,900      | 35.36     | 52,661,733,312        | 95.28%    | 33.71           |
| <i>E. sinensis</i> | Eshf-4    | Dongying, China     | Female | 51,426,074,400      | 32.92     | 49,194,310,555        | 95.35%    | 31.49           |
| <i>E. sinensis</i> | Eshf-5    | Dongying, China     | Female | 67,113,468,300      | 42.96     | 63,692,372,346        | 95.58%    | 40.77           |
| <i>E. sinensis</i> | Espf-1    | Panjin, China       | Female | 54,197,604,600      | 34.69     | 51,887,322,562        | 94.99%    | 33.21           |
| <i>E. sinensis</i> | Espf-2    | Panjin, China       | Female | 67,617,211,800      | 43.28     | 64,148,397,114        | 95.18%    | 41.06           |
| <i>E. sinensis</i> | Espf-3    | Panjin, China       | Female | 58,635,499,800      | 37.53     | 55,773,840,807        | 94.93%    | 35.70           |
| <i>E. sinensis</i> | Espf-4    | Panjin, China       | Female | 56,281,331,100      | 36.03     | 51,819,671,041        | 94.37%    | 33.17           |
| <i>E. sinensis</i> | Espf-5    | Panjin, China       | Female | 66,907,331,400      | 42.83     | 63,043,495,651        | 93.49%    | 40.35           |

**Supplementary Table 14. Distribution of SNPs within various genomic regions of mitten crabs.**

| Parameter               | <i>E. sinensis</i> |
|-------------------------|--------------------|
| Sample size             | 15                 |
| SNP sites               | 43,416,862         |
| SNP Intergenic          | 38,189,678         |
| SNP exon                | 498,682            |
| Synonymous              | 317,138            |
| nonSynonymous           | 176,144            |
| nonSyn/Syn              | 0.55542            |
| Stop gain               | 4,455              |
| Stop loss               | 945                |
| SNP Intron              | 3,624,510          |
| SNP splicing            | 2,171              |
| SNP downstream          | 517,723            |
| SNP upstream            | 566,695            |
| SNP upstream;downstream | 17,403             |

**Supplementary Table 15. Polymorphism analysis in ten resequenced *E. sinensis* individuals.**

| Sample ID |       | Total      | Rate (%) | Intergenic | Rate (%) | Genic region | Rate (%) | Exon    | Rate (%) | Intron  | Rate (%) |
|-----------|-------|------------|----------|------------|----------|--------------|----------|---------|----------|---------|----------|
| Escm-1    | SNP   | 12,639,546 | 1.200    | 11,208,819 | 1.189    | 1,009,395    | 0.900    | 121,473 | 0.675    | 887,922 | 0.943    |
|           | INDEL | 3,205,401  | 0.304    | 2,885,143  | 0.306    | 233,075      | 0.208    | 12,011  | 0.067    | 221,064 | 0.235    |
| Escm-2    | SNP   | 12,594,775 | 1.194    | 11,156,290 | 1.182    | 1,004,819    | 0.892    | 131,540 | 0.711    | 873,279 | 0.927    |
|           | INDEL | 3,163,678  | 0.300    | 2,847,554  | 0.302    | 230,259      | 0.204    | 11,843  | 0.064    | 218,416 | 0.232    |
| Escm-3    | SNP   | 12,594,843 | 1.194    | 11,165,347 | 1.183    | 1,011,735    | 0.903    | 118,833 | 0.664    | 892,902 | 0.948    |
|           | INDEL | 3,174,102  | 0.301    | 2,854,708  | 0.303    | 232,627      | 0.208    | 11,848  | 0.066    | 220,779 | 0.234    |
| Escm-4    | SNP   | 12,544,374 | 1.193    | 11,110,952 | 1.182    | 1,003,041    | 0.892    | 129,740 | 0.705    | 873,301 | 0.929    |
|           | INDEL | 3,109,950  | 0.296    | 2,797,209  | 0.298    | 227,622      | 0.202    | 11,710  | 0.064    | 215,912 | 0.230    |
| Escm-5    | SNP   | 12,487,097 | 1.184    | 11,049,286 | 1.171    | 1,003,592    | 0.892    | 132,204 | 0.717    | 871,388 | 0.926    |
|           | INDEL | 3,203,660  | 0.304    | 2,880,726  | 0.305    | 234,748      | 0.209    | 12,172  | 0.066    | 222,576 | 0.237    |
| Eshf-1    | SNP   | 12,534,716 | 1.188    | 11,121,095 | 1.178    | 1,002,339    | 0.897    | 115,987 | 0.659    | 886,352 | 0.941    |
|           | INDEL | 3,152,261  | 0.299    | 2,836,672  | 0.300    | 229,661      | 0.205    | 11,775  | 0.067    | 217,886 | 0.231    |
| Eshf-2    | SNP   | 12,530,614 | 1.191    | 11,110,352 | 1.181    | 1,007,469    | 0.901    | 115,676 | 0.655    | 891,793 | 0.948    |
|           | INDEL | 3,126,451  | 0.297    | 2,812,644  | 0.299    | 228,527      | 0.204    | 11,666  | 0.066    | 216,861 | 0.230    |
| Eshf-3    | SNP   | 12,500,845 | 1.188    | 11,084,453 | 1.177    | 1,004,706    | 0.899    | 115,942 | 0.656    | 888,764 | 0.944    |
|           | INDEL | 3,125,898  | 0.297    | 2,811,012  | 0.299    | 229,291      | 0.205    | 11,824  | 0.067    | 217,467 | 0.231    |
| Eshf-4    | SNP   | 12,505,633 | 1.192    | 11,087,385 | 1.182    | 1,007,306    | 0.902    | 115,355 | 0.652    | 891,951 | 0.949    |
|           | INDEL | 3,103,003  | 0.296    | 2,791,277  | 0.298    | 227,123      | 0.203    | 11,689  | 0.066    | 215,434 | 0.229    |
| Espf-1    | SNP   | 12,138,836 | 1.155    | 10,778,319 | 1.146    | 963,922      | 0.863    | 111,209 | 0.631    | 852,713 | 0.907    |
|           | INDEL | 3,115,770  | 0.296    | 2,802,858  | 0.298    | 227,530      | 0.204    | 11,823  | 0.067    | 215,707 | 0.229    |

**Supplementary Table 16. Calibrations used in dating analysis (see Fig. 2a).**

| Taxon A            | Taxon B            | Time (MYA) | References     |
|--------------------|--------------------|------------|----------------|
| <i>Eriocheir</i>   | <i>Portunus</i>    | 139-238    | <sup>3</sup>   |
| <i>Tigriopus</i>   | <i>Eurytemora</i>  | 194-364    |                |
| <i>Daphnia</i>     | <i>Eulimnadia</i>  | 128-298    |                |
| <i>Tetranychus</i> | <i>Litopenaeus</i> | 568-642    |                |
| <i>Daphnia</i>     | <i>Drosophila</i>  | 510-543    | <sup>4,5</sup> |
| <i>Tribolium</i>   | <i>Drosophila</i>  | 307-414    | <sup>4,6</sup> |

**Supplementary Table 17. Gene copy numbers of representative expanded gene families of *E. sinensis*.**

|       | F-H-ATPase | ABC family | thioredoxin | Hsp70 | MnSOD | Thioredoxin peroxidase |
|-------|------------|------------|-------------|-------|-------|------------------------|
| DPULE | 17         | 5          | 5           | 2     | 1     | 1                      |
| ETEX  | 26         | 5          | 6           | 2     | 1     | 1                      |
| EAFFI | 30         | 20         | 19          | 3     | 1     | 1                      |
| TCALI | 12         | 12         | 7           | 1     | 1     | 3                      |
| HAZTE | 25         | 3          | 6           | 11    | 2     | 0                      |
| PHAW  | 15         | 4          | 0           | 5     | 0     | 1                      |
| LVANN | 20         | 15         | 9           | 14    | 2     | 1                      |
| PTRIT | 16         | 4          | 8           | 4     | 1     | 1                      |
| PVIRG | 15         | 5          | 4           | 6     | 2     | 3                      |
| AVULG | 19         | 8          | 11          | 11    | 2     | 0                      |
| BMORI | 21         | 6          | 9           | 1     | 1     | 1                      |
| DMEAN | 16         | 7          | 11          | 3     | 1     | 1                      |
| TCAST | 12         | 13         | 7           | 2     | 1     | 1                      |
| TURTI | 11         | 31         | 8           | 3     | 1     | 0                      |
| ESINE | 102        | 37         | 28          | 20    | 19    | 19                     |



**Supplementary Table 18. Summary of genes located on Hox scaffolds in the *E. sinensis* genome.**

| Scaffold ID    | GeneID       | Location start | Location end | Stand |
|----------------|--------------|----------------|--------------|-------|
| Scaffold_Hox_1 | gene28       | 5214           | 6390         | +     |
| Scaffold_Hox_1 | gene29       | 6580           | 10815        | +     |
| Scaffold_Hox_1 | gene36       | 52782          | 53983        | +     |
| Scaffold_Hox_1 | lab          | 63470          | 105071       | -     |
| Scaffold_Hox_1 | pb           | 162835         | 166641       | -     |
| Scaffold_Hox_1 | Hox3         | 393743         | 402812       | -     |
| Scaffold_Hox_1 | gene76       | 442486         | 452337       | +     |
| Scaffold_Hox_1 | miR-993      | 536334         | 536422       | +     |
| Scaffold_Hox_1 | gene91       | 598288         | 602910       | +     |
| Scaffold_Hox_2 | gene93       | 19538          | 20044        | -     |
| Scaffold_Hox_2 | Dfd          | 329386         | 363583       | -     |
| Scaffold_Hox_2 | miR-10       | 403728         | 403810       | -     |
| Scaffold_Hox_2 | Scr          | 531071         | 608012       | -     |
| Scaffold_Hox_2 | ftz          | 648227         | 653276       | -     |
| Scaffold_Hox_2 | Antp         | 829249         | 869738       | -     |
| Scaffold_Hox_3 | Ubx          | 154613         | 634114       | -     |
| Scaffold_Hox_3 | abd-A        | 941655         | 1094885      | -     |
| Scaffold_Hox_3 | miR-iab-4/8a | 1389196        | 1389270      | +     |
| Scaffold_Hox_3 | miR-iab-4/8b | 1400542        | 1400616      | +     |
| Scaffold_Hox_3 | gene317      | 1418564        | 1419299      | +     |
| Scaffold_Hox_4 | Abd-B        | 111738         | 160053       | -     |

**Supplementary Table 19. The up-regulated IAG pathway genes in AG of *E. sinensis* after eyestalk ablation based on the KEGG analysis. EAT(C) A: EA means eyestalk ablation; T(C) means treatment group or control group; A means androgenic gland.**

| Name       | EAT_A readcount | EAC_A readcount | Padj     | KO ID  | Description                                                     |
|------------|-----------------|-----------------|----------|--------|-----------------------------------------------------------------|
| SSR3       | 1983.2          | 973.99          | 0.034714 | K13251 | translocon-associated protein subunit gamma                     |
| SWP1, RPN2 | 4112.7          | 2015.41         | 0.036742 | K12667 | oligosaccharyltransferase complex subunit delta (ribophorin II) |
| HUGT       | 2855.07         | 1346.36         | 0.047246 | K11718 | UDP-glucose:glycoprotein glucosyltransferase                    |
| DNAJB11    | 572.09          | 245.29          | 0.02402  | K09517 | DnaJ homolog subfamily B member 11                              |
| CALR       | 16701.5         | 6980.85         | 0.037585 | K08057 | calreticulin                                                    |
| ADCY2      | 8.18            | 1.07            | 0.028149 | K08042 | adenylate cyclase 2                                             |
| PRKG       | 31.53           | 10.79           | 0.044336 | K07376 | protein kinase, cGMP-dependent                                  |
| STT3       | 4141.15         | 1833.52         | 0.027893 | K07151 | dolichyl-diphosphooligosaccharide--protein glycosyltransferase  |
| GLRA2      | 20.9            | 6.44            | 0.03688  | K05194 | glycine receptor alpha-2                                        |

**Supplementary Table 20. Primer sequences used in the Hox gene analysis.**

| Name               | Sequence (5'-3')         |
|--------------------|--------------------------|
| Ubx-RTF            | CGCCAAGGACCAGAATG        |
| Ubx-RTR            | GGGTATCCCCGAGCAAC        |
| AbdA-RTF           | GCAATGCCGCTACTCCCA       |
| AbdA-RTR           | CGTGTATGTCTGTCTCCCTC     |
| AbdB-RTF           | GTGGTGTAACATCCTCCGTA     |
| AbdB-RTR           | CTCAGGTAGCCGTCGTG        |
| $\beta$ -actin-RTF | GCATCCACGAGACCACTTACA    |
| $\beta$ -actin-RTR | CTCCTGCTTGCTGATCCACATC   |
| miR-4-5p-RT        | GGACGTATACTGAATGTATCCTGA |
| miR-8-3p-RT        | GCACATTCAGTATACGTCCAA    |
| Abd-A-mRNA probe   | ACAGCAGCCGTCAACAGCCAAT   |
| GFP-mRNA probe     | GAGTTCAAGTCCATCTACATGG   |

**Supplementary Table 21. Primer sequences used in the AG network analysis.**

| Name        | Sequence (5'-3')                         |
|-------------|------------------------------------------|
| NGL1_RTf    | CCAAGAGGCAGTCATAGAT                      |
| NGL1_RTR    | ATGCCGTTGACTTTAGGTG                      |
| NEFH_RTf    | ACCAAGGTCACGGTTTCCA                      |
| NEFH_RTR    | GTCCGTCCTTCACGATGGT                      |
| SYT1_RTf    | GAAAACCCACAGTTCAACG                      |
| SYT1_RTR    | AGCCAAAAAGTATTCCCAA                      |
| DOP2R-2_RTf | TAGCGGCGTTTCTGGTGTG                      |
| DOP2R-2_RTR | TCGTGTAGATGACGGGGTT                      |
| FAS1-1_RTf  | GGTTCCTTGTCTCCCGTTT                      |
| FAS1-1_RTR  | GCTTGTGGTGCCGCTTTTT                      |
| NGEF-2_RTf  | GGACACGGCTGACAAGTTC                      |
| NGEF-2_RTR  | ATCTGACTCCATCGGGCAT                      |
| IAG1_RTf    | GCCTTCCGTCCTTCTGCTA                      |
| IAG1_RTR    | GCAGCCGTCGAGATGTTAG                      |
| IAG2_RTf    | TTTTCAAGTCGTTAGGTCATCATT                 |
| IAG2_RTR    | CTTGATATGAGAGCTGAAGTCGTGG                |
| SM_F1       | CTATGCTTAATACATCGACTCAGCTTG              |
| SM_R1       | GTAATAGTATGTGTTTGTATCCAATTCTTT           |
| SM_F2       | ATGTATTACAGAAATGCACCAG                   |
| SM_R2       | TGTTACCCGATAAACCCTA                      |
| IAG_RTf     | TCCGTCCTTCTGCTAATGCTG                    |
| IAG_RTR     | CAGTGGGAGTGATTGGGAACA                    |
| iDMY_RTf    | CACCCATCTACACCAAAAGC                     |
| iDMY_RTR    | CTGCCCCACACAACCTCTCT                     |
| dsiDMY_F    | TAATACGACTCACTATAGGGGCAACTGTGCCTTCTGTGA  |
| dsiDMY_R    | TAATACGACTCACTATAGGGGCTCTTCGTCCCTTCTTTT  |
| dsEGFP-F    | TAATACGACTCACTATAGGGCACAAGTTCAGCGTGTCCG  |
| dsEGFP-R    | TAATACGACTCACTATAGGGTGGGTGCTCAGGTAGTGGTT |

## Supplementary References

1. Tang, B.P. *et al.* High-quality genome assembly of *Eriocheir japonica sinensis* reveals its unique genome evolution. *Frontiers in Genetics* **10**(2020).
2. Song, L. *et al.* Draft genome of the Chinese mitten crab, *Eriocheir sinensis*. *GigaScience* **5**, 5 (2016).
3. Kumar, S., Stecher, G., Suleski, M. & Hedges, S.B. TimeTree: A Resource for Timelines, Timetrees, and Divergence Times. *Molecular Biology and Evolution* **34**, 1812-1819 (2017).
4. Benton, M.J., Donoghue, P.C.J. & Asher, R.J. *Calibrating and constraining molecular clocks*, (Oxford Univ. Press, 2009).
5. De Bie, T., Cristianini, N., Demuth, J.P. & Hahn, M.W. CAFE: a computational tool for the study of gene family evolution. *Bioinformatics* **22**, 1269-71 (2006).
6. Hahn, M.W., De Bie, T., Stajich, J.E., Nguyen, C. & Cristianini, N. Estimating the tempo and mode of gene family evolution from comparative genomic data. *Genome Research* **15**, 1153-60 (2005).
